# Supplementary material
Source: MDPI journal article supplement (https://www.mdpi.com/2304-6740/7/5/58)

# checkCIF/PLATON report

Structure factors have been supplied for datablock(s) 1, 2

THIS REPORT IS FOR GUIDANCE ONLY. IF USED AS PART OF A REVIEW PROCEDURE FOR PUBLICATION, IT SHOULD NOT REPLACE THE EXPERTISE OF AN EXPERIENCED CRYSTALLOGRAPHIC REFEREE.

No syntax errors found.      CIF dictionary      Interpreting this report

## Datablock: 1

---

|                 |                |                                |
|-----------------|----------------|--------------------------------|
| Bond precision: | C-C = 0.0038 A | Wavelength=0.71069             |
| Cell:           | a=9.5916(10)   | b=33.666(3)      c=13.3219(13) |
|                 | alpha=90       | beta=105.255(3)      gamma=90  |
| Temperature:    | 150 K          |                                |
|                 | Calculated     | Reported                       |
| Volume          | 4150.2(7)      | 4150.2(7)                      |
| Space group     | C 2/c          | C 2/c                          |
| Hall group      | -C 2yc         | -C 2yc                         |
| Moiety formula  | C10 H12 N4 Ni  | C10 H12 N4 Ni                  |
| Sum formula     | C10 H12 N4 Ni  | C10 H12 N4 Ni                  |
| Mr              | 246.93         | 246.95                         |
| Dx,g cm-3       | 1.581          | 1.581                          |
| Z               | 16             | 16                             |
| Mu (mm-1)       | 1.839          | 1.839                          |
| F000            | 2048.0         | 2048.0                         |
| F000'           | 2053.75        |                                |
| h,k,lmax        | 11,40,16       | 11,40,16                       |
| Nref            | 3952           | 3910                           |
| Tmin,Tmax       | 0.916,0.964    | 0.650,0.746                    |
| Tmin'           | 0.576          |                                |

Correction method= # Reported T Limits: Tmin=0.650 Tmax=0.746  
AbsCorr = MULTI-SCAN

Data completeness= 0.989      Theta(max)= 25.680

R(reflections)= 0.0308( 3204)      wR2(reflections)= 0.0793( 3910)

S = 1.038      Npar= 275

---

The following ALERTS were generated. Each ALERT has the format  
**test-name\_ALERT\_alert-type\_alert-level.**  
Click on the hyperlinks for more details of the test.

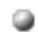

## Alert level G

PLAT232\_ALERT\_2\_G Hirshfeld Test Diff (M-X) Ni2 --N7 . 5.2 s.u.  
PLAT883\_ALERT\_1\_G No Info for \_atom\_sites\_solution\_primary ..... Please Do !  
PLAT933\_ALERT\_2\_G Number of OMIT Records in Embedded .res File ... 1 Note

0 **ALERT level A** = Most likely a serious problem - resolve or explain  
0 **ALERT level B** = A potentially serious problem, consider carefully  
0 **ALERT level C** = Check. Ensure it is not caused by an omission or oversight  
3 **ALERT level G** = General information/check it is not something unexpected

1 ALERT type 1 CIF construction/syntax error, inconsistent or missing data  
2 ALERT type 2 Indicator that the structure model may be wrong or deficient  
0 ALERT type 3 Indicator that the structure quality may be low  
0 ALERT type 4 Improvement, methodology, query or suggestion  
0 ALERT type 5 Informative message, check

## Datablock: 2

Bond precision: C-C = 0.0046 Å Wavelength=0.71069  
Cell: a=9.4362(7) b=10.7558(7) c=17.0271(12)  
alpha=103.204(2) beta=94.650(2) gamma=93.872(2)  
Temperature: 150 K

|                | Calculated              | Reported                |
|----------------|-------------------------|-------------------------|
| Volume         | 1670.3(2)               | 1670.3(2)               |
| Space group    | P -1                    | P -1                    |
| Hall group     | -P 1                    | -P 1                    |
| Moiety formula | C30 H42 N4 Ni Yb, C7 H8 | C30 H42 N4 Ni Yb, C7 H8 |
| Sum formula    | C37 H50 N4 Ni Yb        | C37 H50 N4 Ni Yb        |
| Mr             | 782.54                  | 782.56                  |
| Dx,g cm-3      | 1.556                   | 1.556                   |
| Z              | 2                       | 2                       |
| Mu (mm-1)      | 3.377                   | 3.377                   |
| F000           | 796.0                   | 796.0                   |
| F000'          | 796.11                  |                         |
| h,k,lmax       | 11,13,21                | 11,13,21                |
| Nref           | 6840                    | 6781                    |
| Tmin,Tmax      | 0.573,0.713             | 0.605,0.746             |
| Tmin'          | 0.385                   |                         |

Correction method= # Reported T Limits: Tmin=0.605 Tmax=0.746  
AbsCorr = MULTI-SCAN

Data completeness= 0.991 Theta(max)= 26.369

R(reflections)= 0.0236( 6241) wR2(reflections)= 0.0588( 6781)

S = 0.945

Npar= 404

The following ALERTS were generated. Each ALERT has the format

**test-name\_ALERT\_alert-type\_alert-level.**

Click on the hyperlinks for more details of the test.

### ● Alert level C

|                   |                                                                      |       |       |
|-------------------|----------------------------------------------------------------------|-------|-------|
| PLAT250_ALERT_2_C | Large U3/U1 Ratio for Average U(i,j) Tensor ....                     | 2.2   | Note  |
| PLAT250_ALERT_2_C | Large U3/U1 Ratio for Average U(i,j) Tensor ....                     | 2.7   | Note  |
| PLAT412_ALERT_2_C | Short Intra XH3 .. XHn            H9C            ..H10A            . | 1.85  | Ang.  |
|                   | x,y,z =                                                              | 1_555 | Check |

### ● Alert level G

|                   |                                                       |       |             |
|-------------------|-------------------------------------------------------|-------|-------------|
| PLAT154_ALERT_1_G | The s.u.'s on the Cell Angles are Equal ..(Note)      | 0.002 | Degree      |
| PLAT171_ALERT_4_G | The CIF-Embedded .res File Contains EADP Records      | 1     | Report      |
| PLAT300_ALERT_4_G | Atom Site Occupancy of C31            Constrained at  | 0.5   | Check       |
| PLAT300_ALERT_4_G | Atom Site Occupancy of C32            Constrained at  | 0.5   | Check       |
| PLAT300_ALERT_4_G | Atom Site Occupancy of C33            Constrained at  | 0.5   | Check       |
| PLAT300_ALERT_4_G | Atom Site Occupancy of C34            Constrained at  | 0.5   | Check       |
| PLAT300_ALERT_4_G | Atom Site Occupancy of C35            Constrained at  | 0.5   | Check       |
| PLAT300_ALERT_4_G | Atom Site Occupancy of C36            Constrained at  | 0.5   | Check       |
| PLAT300_ALERT_4_G | Atom Site Occupancy of C37            Constrained at  | 0.5   | Check       |
| PLAT300_ALERT_4_G | Atom Site Occupancy of H31            Constrained at  | 0.5   | Check       |
| PLAT300_ALERT_4_G | Atom Site Occupancy of H32            Constrained at  | 0.5   | Check       |
| PLAT300_ALERT_4_G | Atom Site Occupancy of H33            Constrained at  | 0.5   | Check       |
| PLAT300_ALERT_4_G | Atom Site Occupancy of H34            Constrained at  | 0.5   | Check       |
| PLAT300_ALERT_4_G | Atom Site Occupancy of H35            Constrained at  | 0.5   | Check       |
| PLAT300_ALERT_4_G | Atom Site Occupancy of H37A            Constrained at | 0.5   | Check       |
| PLAT300_ALERT_4_G | Atom Site Occupancy of H37B            Constrained at | 0.5   | Check       |
| PLAT300_ALERT_4_G | Atom Site Occupancy of H37C            Constrained at | 0.5   | Check       |
| PLAT300_ALERT_4_G | Atom Site Occupancy of C38            Constrained at  | 0.5   | Check       |
| PLAT300_ALERT_4_G | Atom Site Occupancy of C39            Constrained at  | 0.5   | Check       |
| PLAT300_ALERT_4_G | Atom Site Occupancy of C40            Constrained at  | 0.5   | Check       |
| PLAT300_ALERT_4_G | Atom Site Occupancy of C41            Constrained at  | 0.5   | Check       |
| PLAT300_ALERT_4_G | Atom Site Occupancy of C42            Constrained at  | 0.5   | Check       |
| PLAT300_ALERT_4_G | Atom Site Occupancy of C43            Constrained at  | 0.5   | Check       |
| PLAT300_ALERT_4_G | Atom Site Occupancy of C44            Constrained at  | 0.5   | Check       |
| PLAT300_ALERT_4_G | Atom Site Occupancy of H39            Constrained at  | 0.5   | Check       |
| PLAT300_ALERT_4_G | Atom Site Occupancy of H40            Constrained at  | 0.5   | Check       |
| PLAT300_ALERT_4_G | Atom Site Occupancy of H41            Constrained at  | 0.5   | Check       |
| PLAT300_ALERT_4_G | Atom Site Occupancy of H42            Constrained at  | 0.5   | Check       |
| PLAT300_ALERT_4_G | Atom Site Occupancy of H43            Constrained at  | 0.5   | Check       |
| PLAT300_ALERT_4_G | Atom Site Occupancy of H44A            Constrained at | 0.5   | Check       |
| PLAT300_ALERT_4_G | Atom Site Occupancy of H44B            Constrained at | 0.5   | Check       |
| PLAT300_ALERT_4_G | Atom Site Occupancy of H44C            Constrained at | 0.5   | Check       |
| PLAT302_ALERT_4_G | Anion/Solvent/Minor-Residue Disorder (Resd 2 )        | 100%  | Note        |
| PLAT302_ALERT_4_G | Anion/Solvent/Minor-Residue Disorder (Resd 3 )        | 100%  | Note        |
| PLAT304_ALERT_4_G | Non-Integer Number of Atoms in ..... Resd 2           | 7.50  | Check       |
| PLAT304_ALERT_4_G | Non-Integer Number of Atoms in ..... Resd 3           | 7.50  | Check       |
| PLAT779_ALERT_4_G | Suspect or Irrelevant (Bond) Angle in CIF .... #      | 98    | Check       |
|                   | N1    -C4    -YB1    1.555    1.555    1.555          | 43.13 | Deg.        |
| PLAT779_ALERT_4_G | Suspect or Irrelevant (Bond) Angle in CIF .... #      | 104   | Check       |
|                   | N2    -C5    -YB1    1.555    1.555    1.555          | 43.04 | Deg.        |
| PLAT789_ALERT_4_G | Atoms with Negative _atom_site_disorder_group #       | 30    | Check       |
| PLAT883_ALERT_1_G | No Info for _atom_sites_solution_primary .....        |       | Please Do ! |
| PLAT933_ALERT_2_G | Number of OMIT Records in Embedded .res File ...      | 4     | Note        |

0 **ALERT level A** = Most likely a serious problem - resolve or explain  
0 **ALERT level B** = A potentially serious problem, consider carefully  
3 **ALERT level C** = Check. Ensure it is not caused by an omission or oversight  
41 **ALERT level G** = General information/check it is not something unexpected

2 ALERT type 1 CIF construction/syntax error, inconsistent or missing data  
4 ALERT type 2 Indicator that the structure model may be wrong or deficient  
0 ALERT type 3 Indicator that the structure quality may be low  
38 ALERT type 4 Improvement, methodology, query or suggestion  
0 ALERT type 5 Informative message, check

---

---

It is advisable to attempt to resolve as many as possible of the alerts in all categories. Often the minor alerts point to easily fixed oversights, errors and omissions in your CIF or refinement strategy, so attention to these fine details can be worthwhile. In order to resolve some of the more serious problems it may be necessary to carry out additional measurements or structure refinements. However, the purpose of your study may justify the reported deviations and the more serious of these should normally be commented upon in the discussion or experimental section of a paper or in the "special\_details" fields of the CIF. checkCIF was carefully designed to identify outliers and unusual parameters, but every test has its limitations and alerts that are not important in a particular case may appear. Conversely, the absence of alerts does not guarantee there are no aspects of the results needing attention. It is up to the individual to critically assess their own results and, if necessary, seek expert advice.

### **Publication of your CIF in IUCr journals**

A basic structural check has been run on your CIF. These basic checks will be run on all CIFs submitted for publication in IUCr journals (*Acta Crystallographica*, *Journal of Applied Crystallography*, *Journal of Synchrotron Radiation*); however, if you intend to submit to *Acta Crystallographica Section C* or *E* or *IUCrData*, you should make sure that full publication checks are run on the final version of your CIF prior to submission.

### **Publication of your CIF in other journals**

Please refer to the *Notes for Authors* of the relevant journal for any special instructions relating to CIF submission.

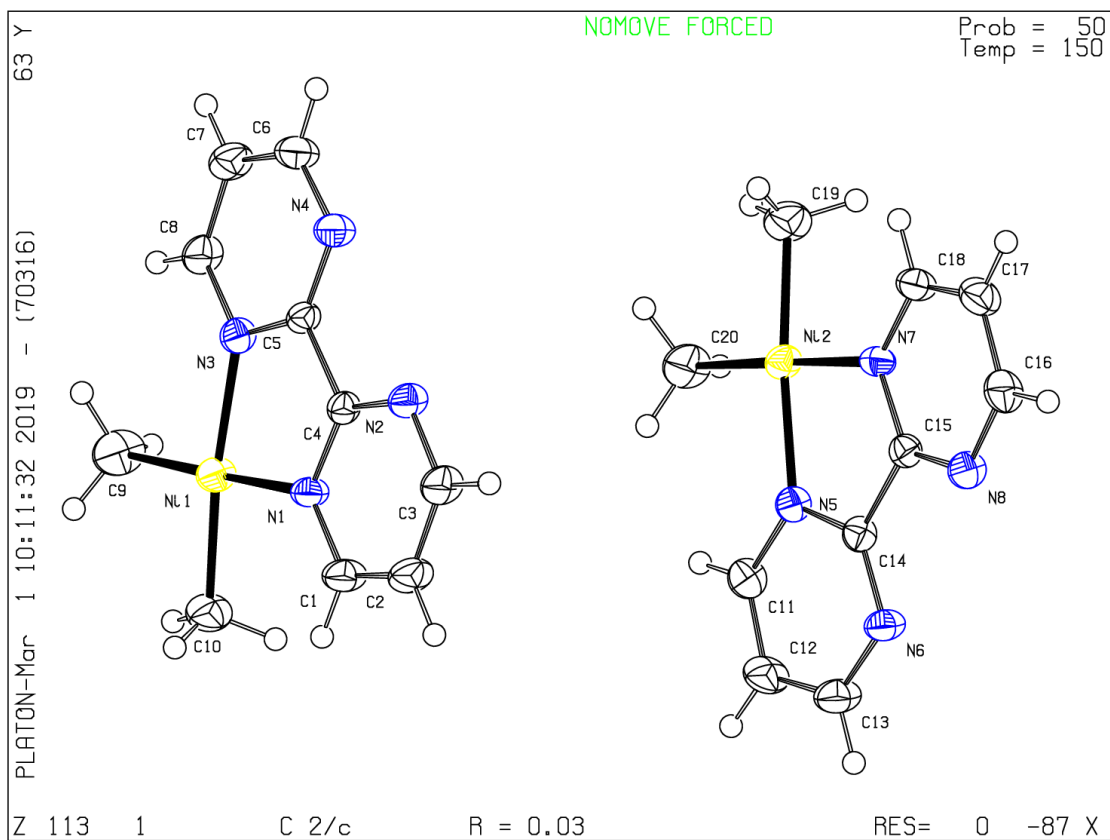

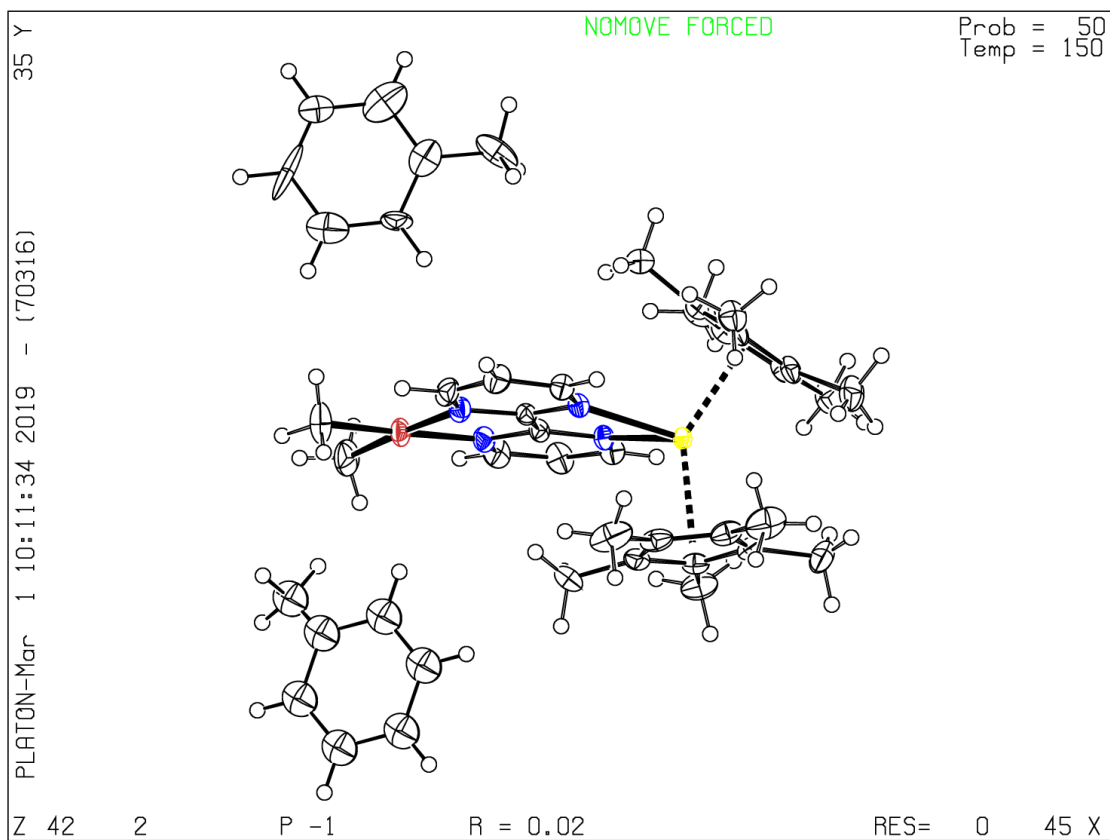

Supplement: s1 [file s1]
