# Supplementary material
Source: MDPI journal article supplement (https://www.mdpi.com/2304-6740/7/5/58)
Supplement: s1 [file s1]

# Supplementary Materials: Reactive Heterobimetallic Complex Combining Divalent Ytterbium and Dimethyl Nickel Fragments

Ding Wang, Jules Moutet, Maxime Tricoire, Marie Cordier and Grégory Nocton

## I. NMR Spectroscopy

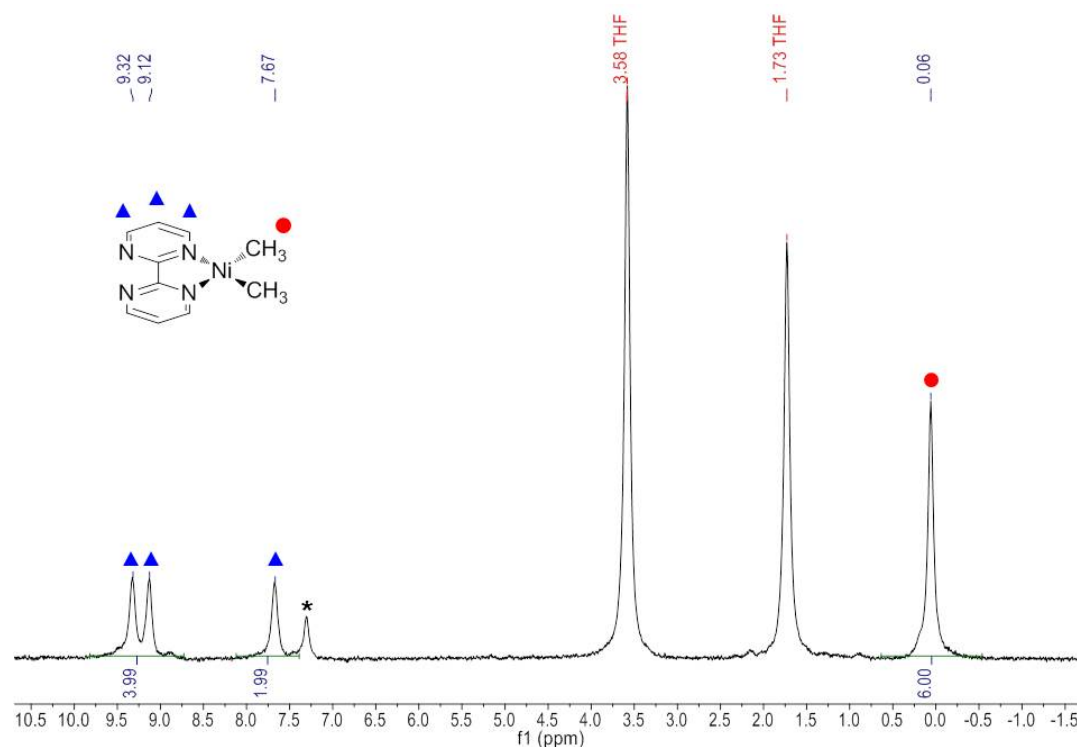

Figure S1A. <sup>1</sup>H NMR of (bipym)NiMe<sub>2</sub> (1) in thf-d<sub>8</sub> at 293 K. Benzene impurities are indicated by \*.

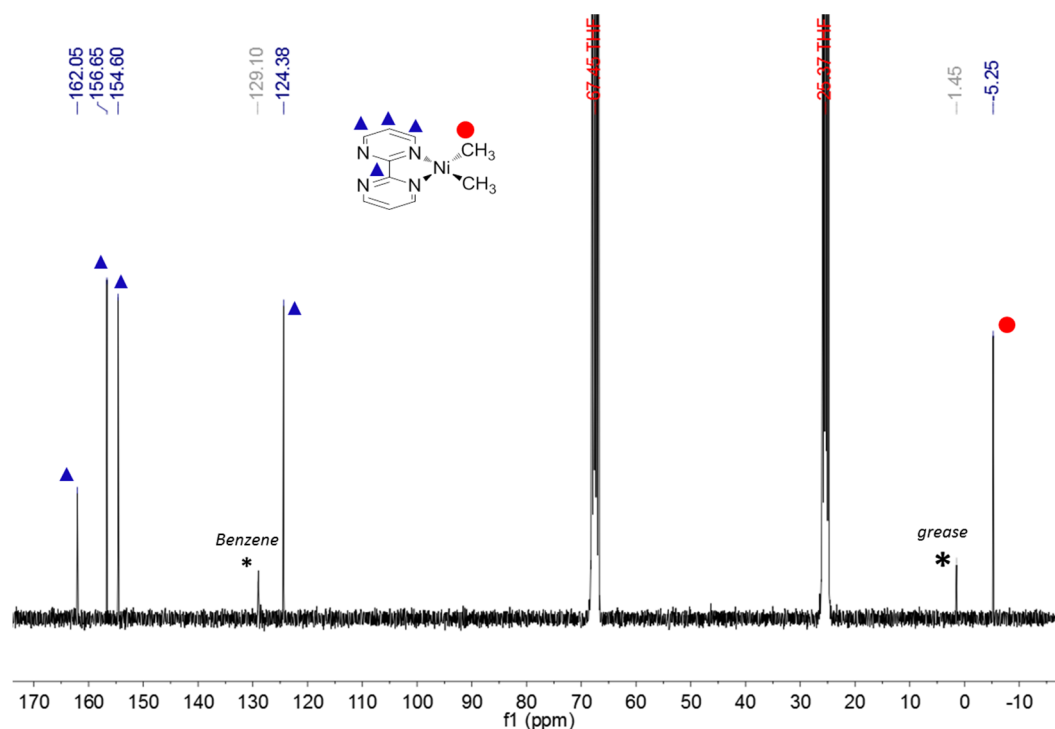

Figure S1B. <sup>13</sup>C NMR of (bipym)NiMe<sub>2</sub> (1) in thf-d<sub>8</sub> at 273 K. Impurities are indicated by \*.

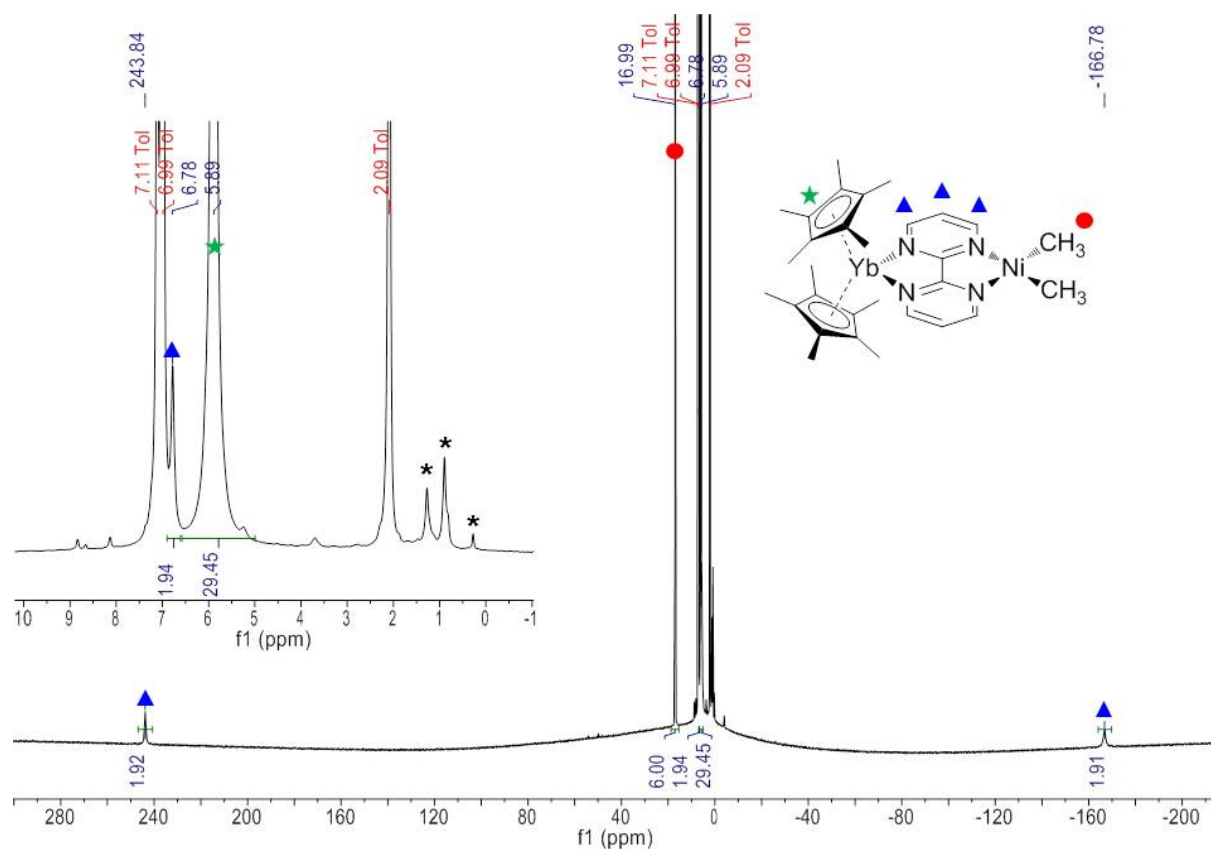

**Figure S2.**  $^1\text{H}$  NMR of  $\text{Cp}^*_2\text{Yb}(\text{bipym})\text{NiMe}_2$  (**2**) in  $\text{tol-d}_8$  at 293 K. Pentane and grease impurities are indicated by \*.

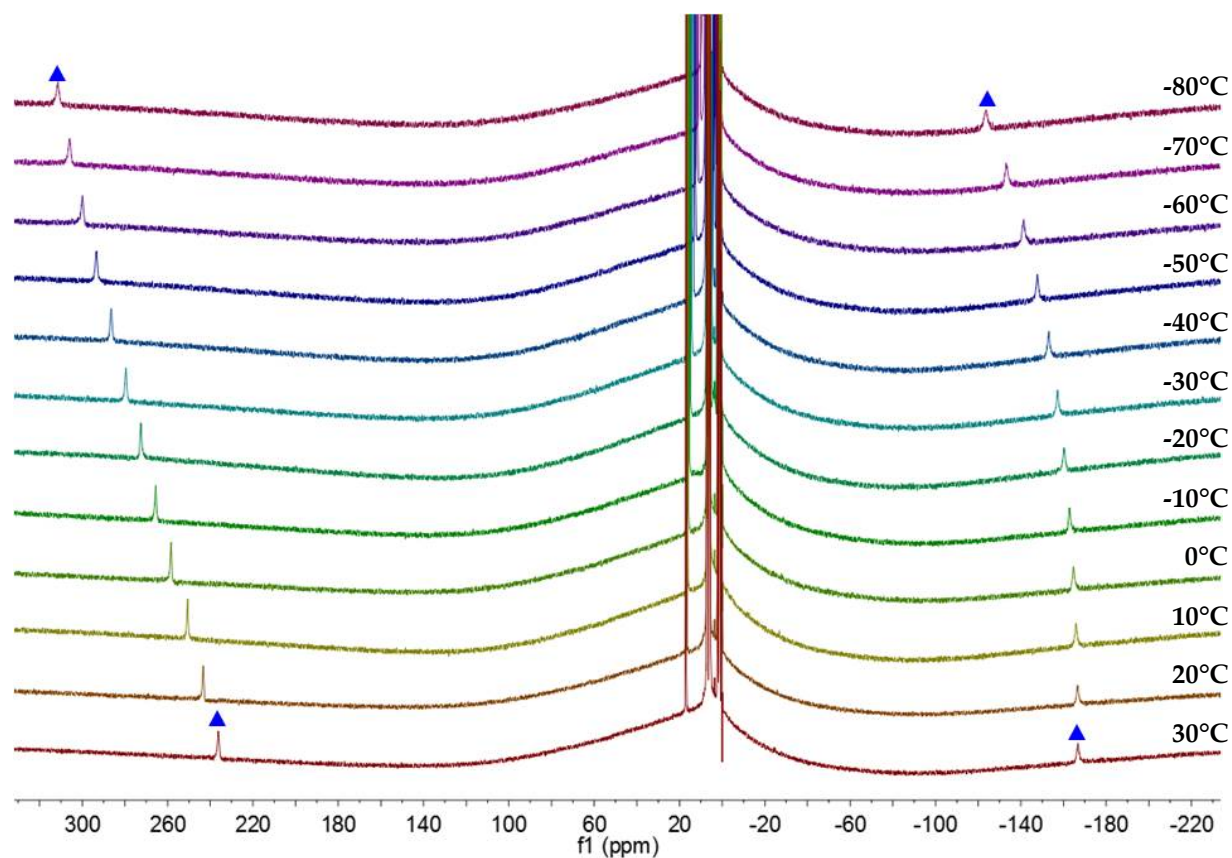

**Figure S3.** Variable temperature  $^1\text{H}$  NMR of  $\text{Cp}^*_2\text{Yb}(\text{bipym})\text{NiMe}_2$  (**2**) in  $\text{tol-d}_8$  between 193 K and 303 K.

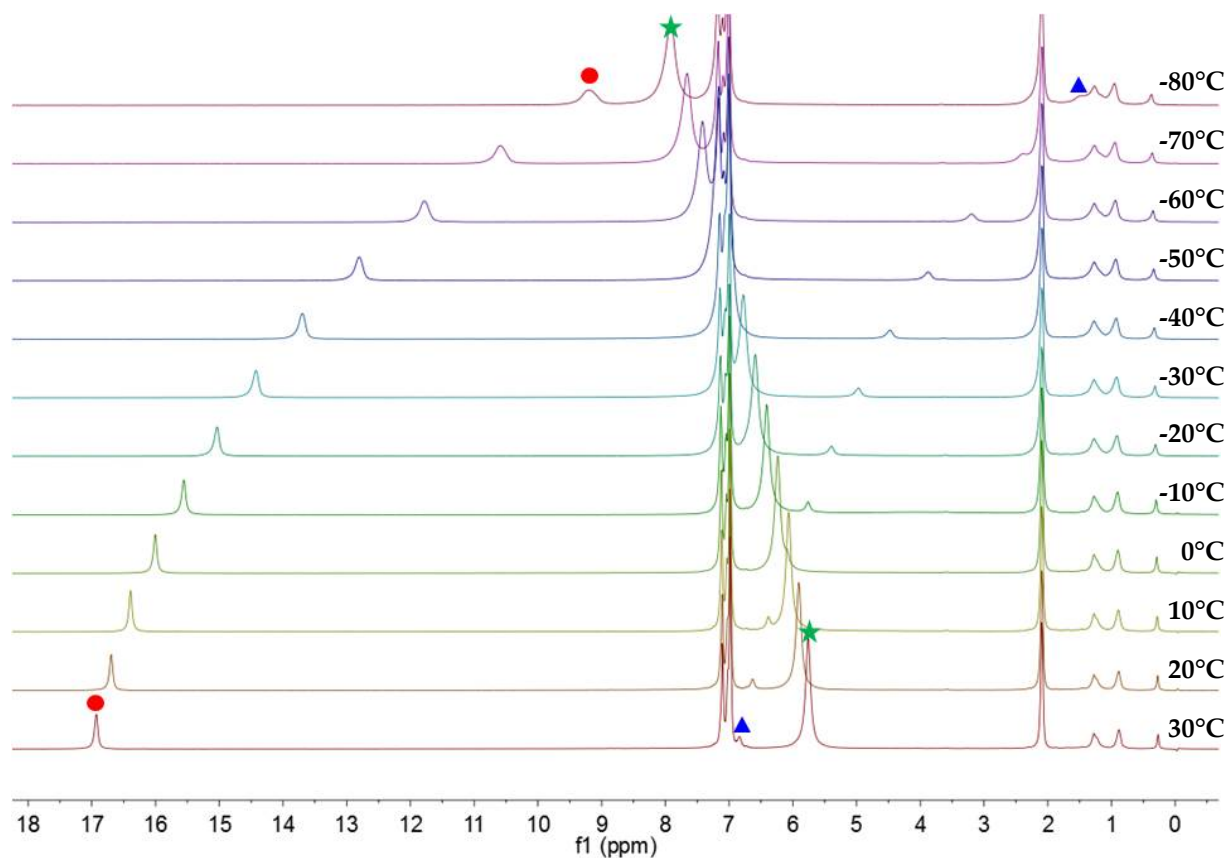

**Figure S4.** Variable temperature  $^1\text{H}$  NMR of  $\text{Cp}^*_2\text{Yb}(\text{bipym})\text{NiMe}_2$  (2) in  $\text{tol-d}_8$  between 193 K and 303 K zoom.

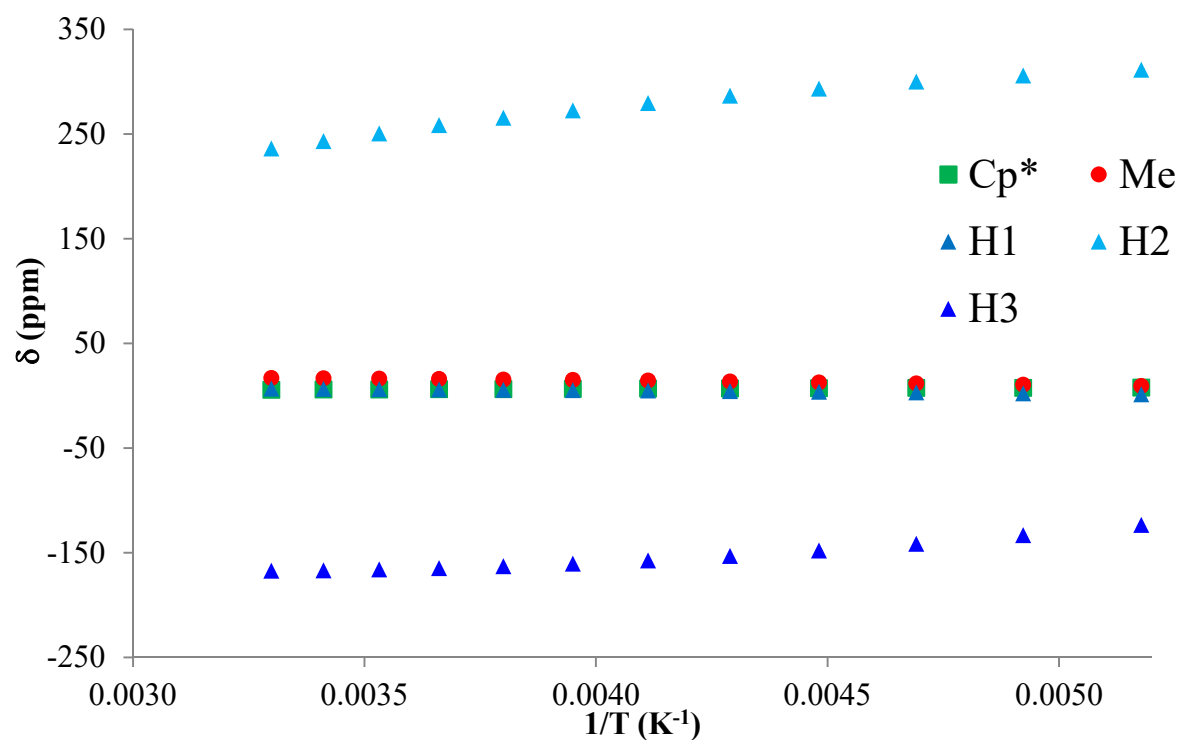

**Figure S5.** Variable temperature  $^1\text{H}$  NMR of  $\text{Cp}^*_2\text{Yb}(\text{bipym})\text{NiMe}_2$  (2) in  $\text{tol-d}_8$  plotted versus  $1/T$  between 193 K and 303 K.

## II. Kinetic analysis

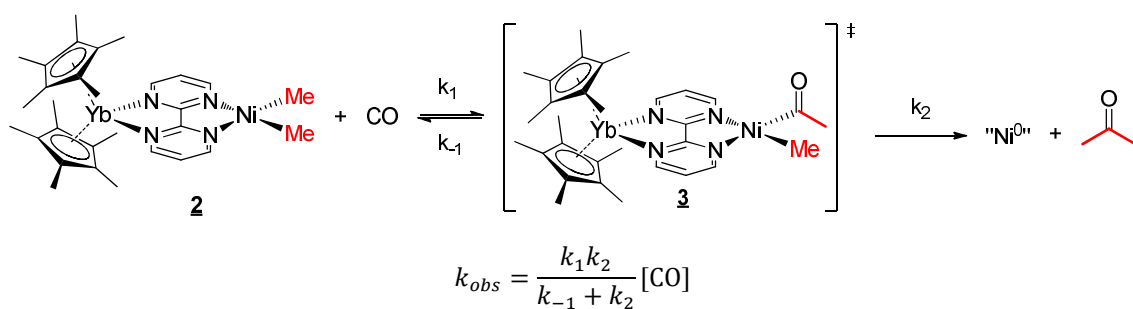Scheme S1. Mechanism for the reaction of **2** with CO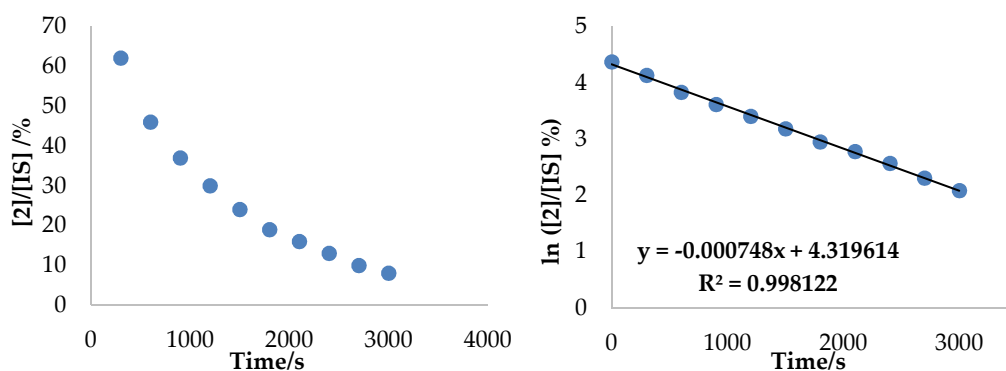Figure S6. Kinetic data for **2** at 35 °C.  $t_{1/2} = 926.7$  s.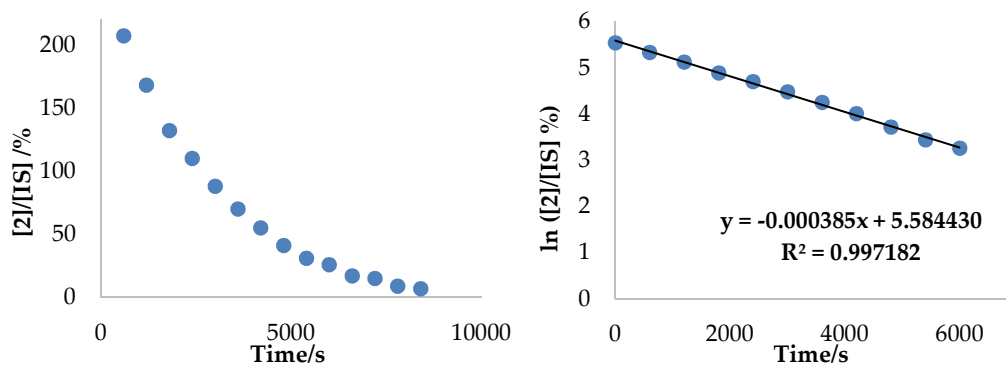Figure S7. Kinetic data for **2** at 30 °C.  $t_{1/2} = 1800.4$  s.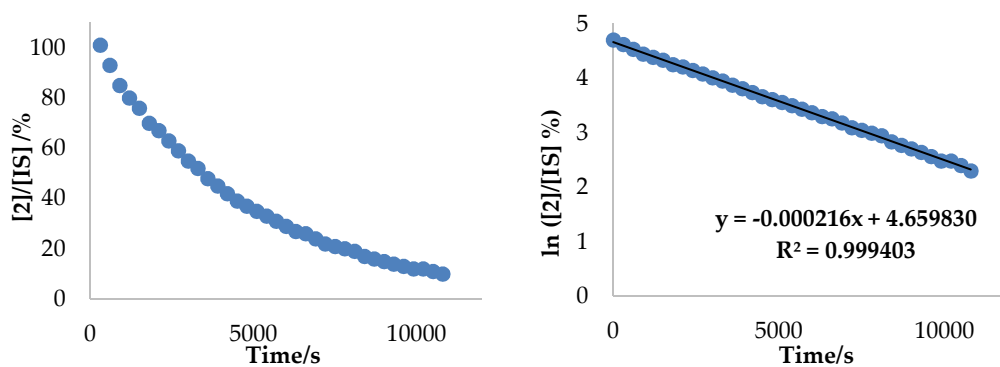Figure S8. Kinetic data for **2** at 25 °C.  $t_{1/2} = 3209.0$  s.

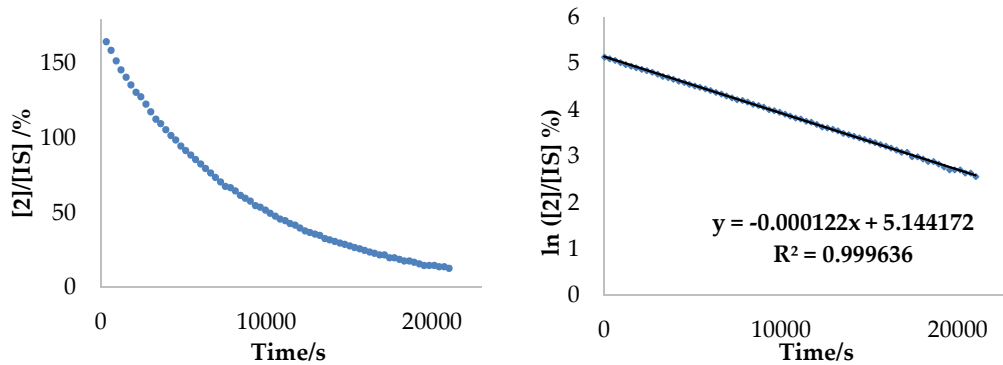

**Figure S9.** Kinetic data for **2** at 20 °C.  $t_{1/2} = 5681.5$  s.

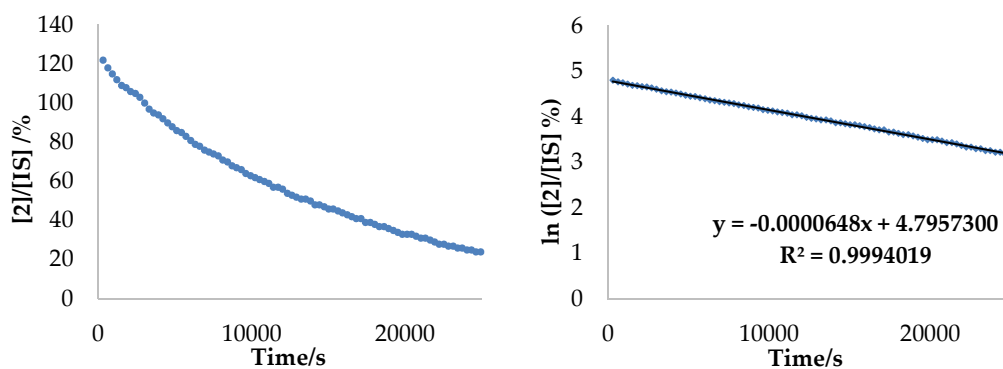

**Figure S10.** Kinetic data for **2** at 15 °C.  $t_{1/2} = 10696.7$  s.

**Table S1.** Eyring Plot data for **2**.

| T (°C) | T (K)  | 1/T (K <sup>-1</sup> ) | k (s <sup>-1</sup> ) | k/T (s <sup>-1</sup> K <sup>-1</sup> ) | ln (k/T)   | t <sub>1/2</sub> (s) |
|--------|--------|------------------------|----------------------|----------------------------------------|------------|----------------------|
| 35     | 308.15 | 0.003245173            | 0.000748             | 2.42739E-06                            | -12.928694 | 926.7                |
| 30     | 303.15 | 0.003298697            | 0.000385             | 1.27E-06                               | -13.576495 | 1800.4               |
| 25     | 298.15 | 0.003354016            | 0.000216             | 7.24468E-07                            | -14.137829 | 3209.0               |
| 20     | 293.15 | 0.003411223            | 0.000122             | 4.16169E-07                            | -14.692174 | 5681.5               |
| 15     | 288.15 | 0.003470415            | 0.0000648            | 2.24883E-07                            | -15.307686 | 10696.7              |

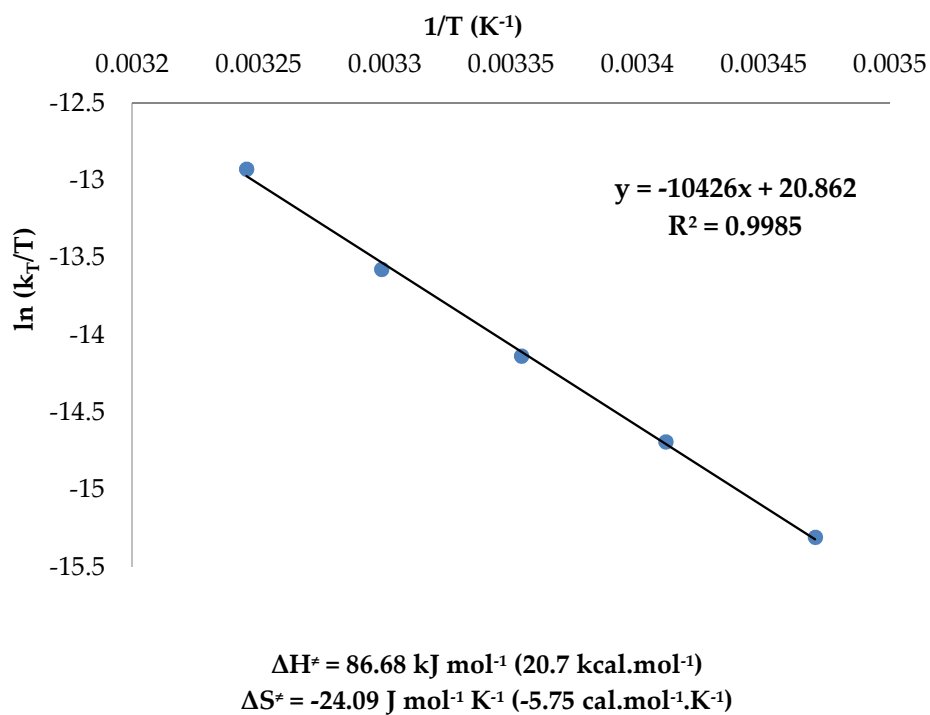**Figure S11.** Eyring Plot and resulting  $\Delta H^\ddagger$  and  $\Delta S^\ddagger$  for **2**

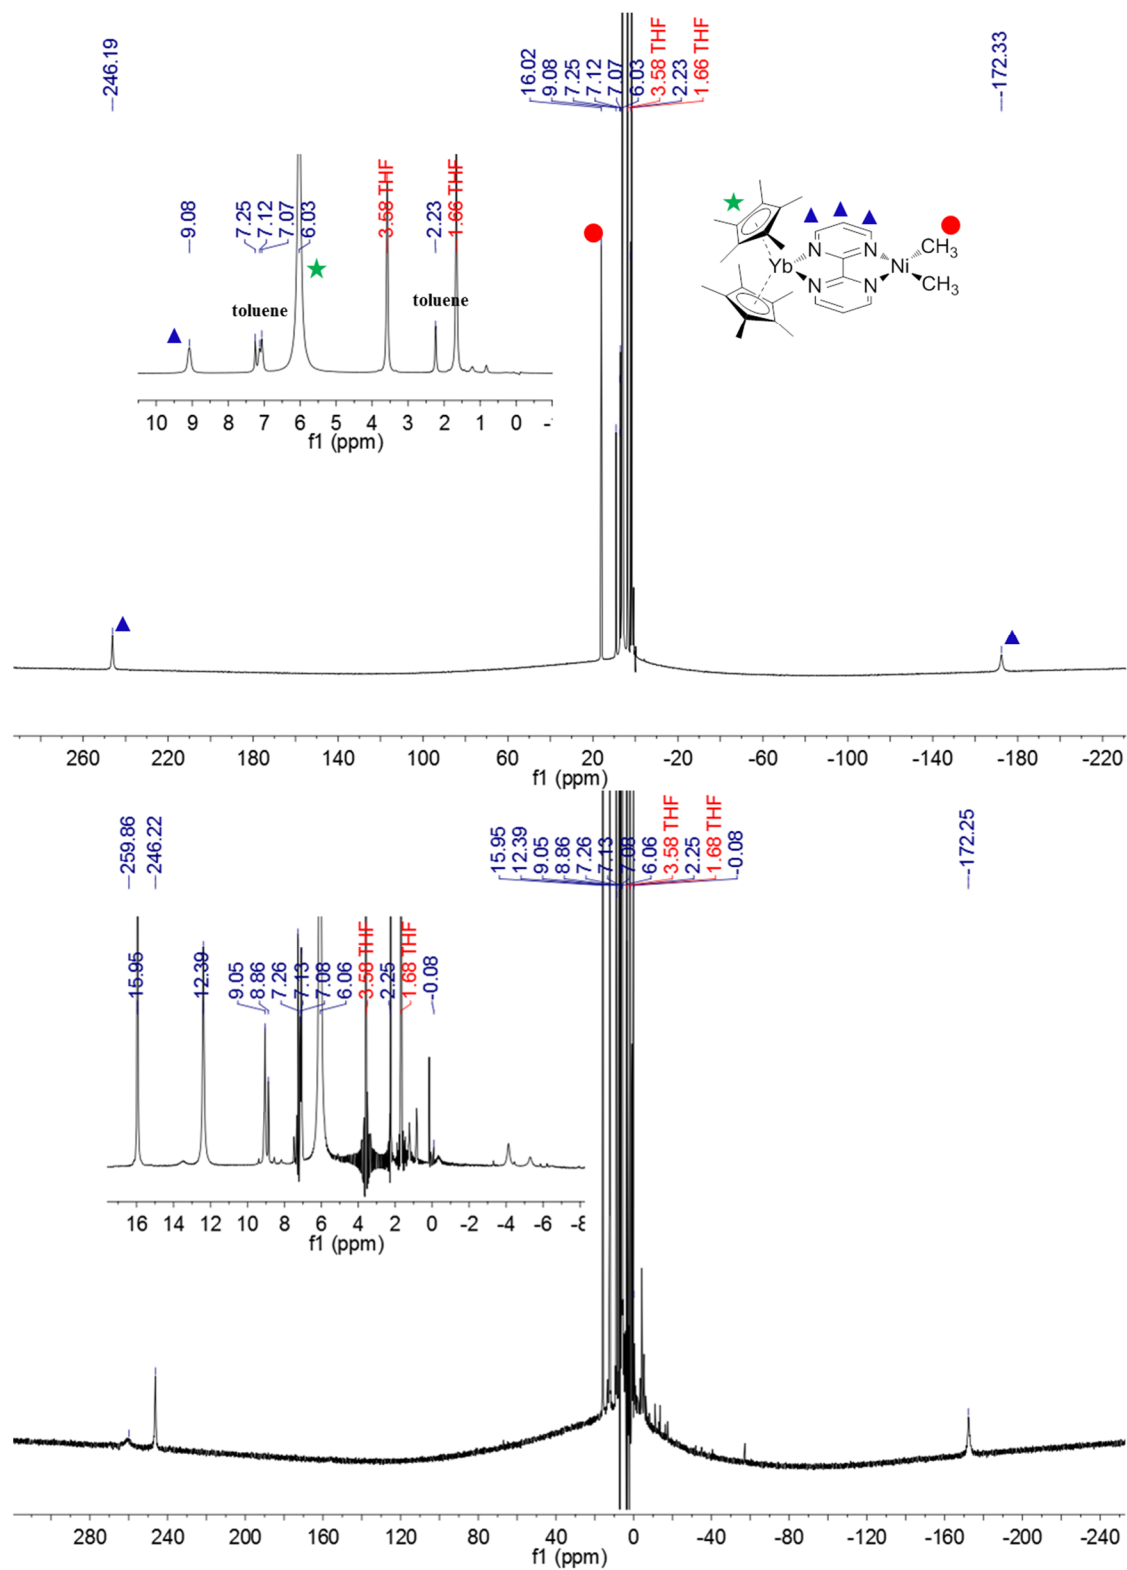

**Figure S12A.**  $^1\text{H}$  NMR of **2** in  $\text{thf-d}_8$  at 293 K (a) before addition of CO (b) after addition of CO (continued).

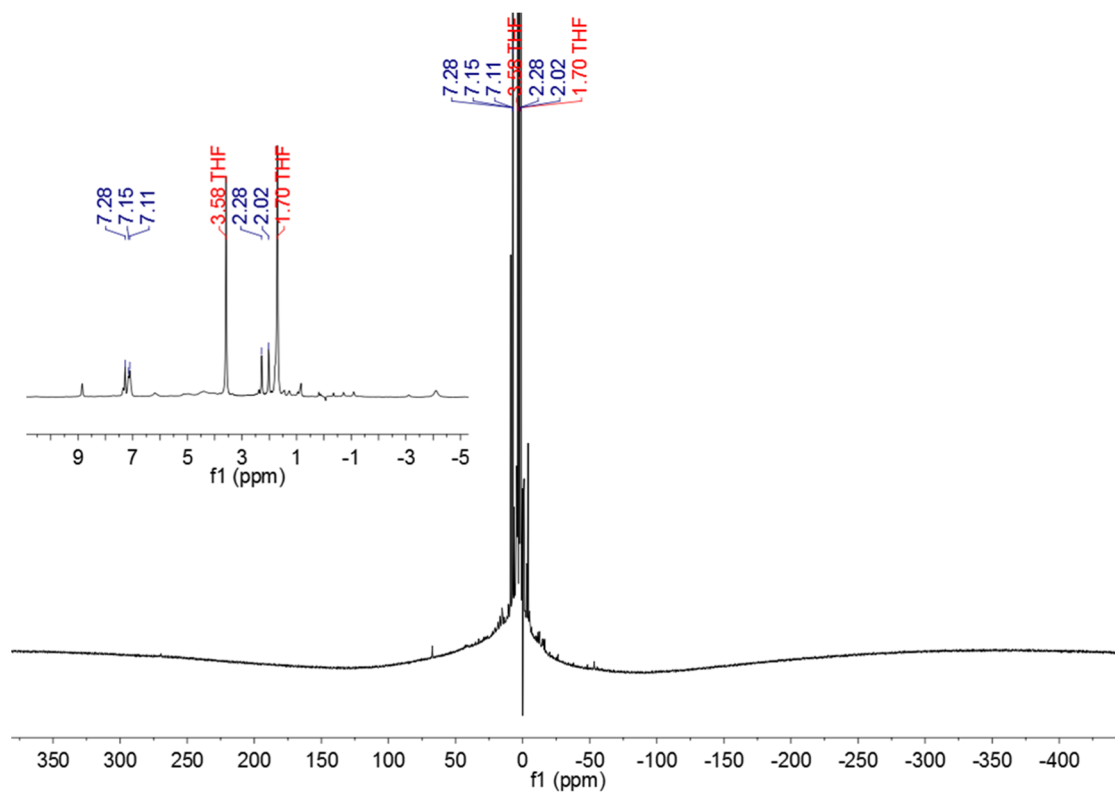

**Figure S12B.**  $^1\text{H}$  NMR of 2 in  $\text{thf-d}_8$  at 293 K (c) after the reaction with CO.



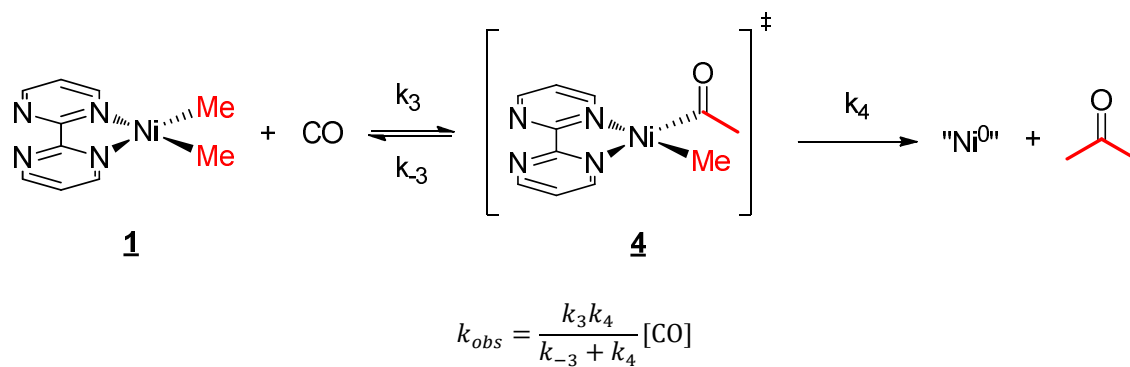

**Scheme S2.** Mechanism for the reaction of **1** with CO.

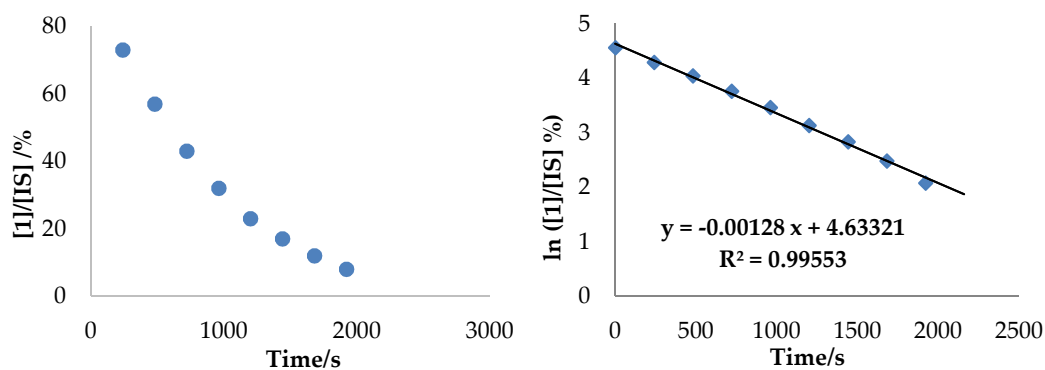

**Figure S13.** Kinetic data for **1** at 35 °C.  $t_{1/2} = 541.5$  s.

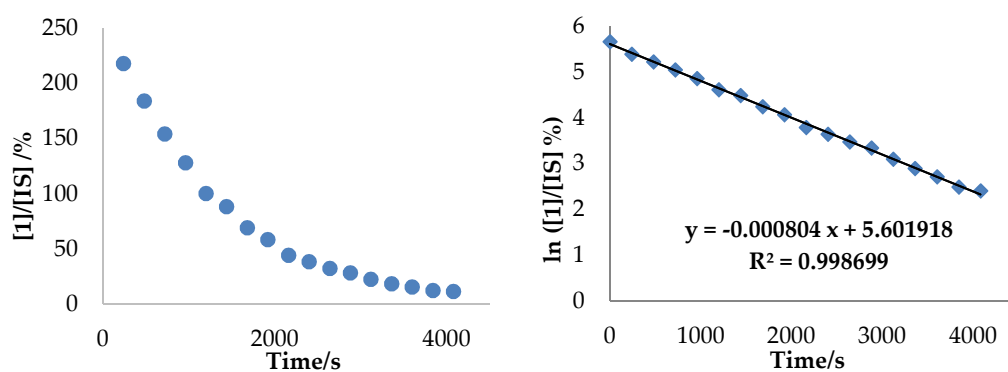

**Figure S14.** Kinetic data for **1** at 30 °C.  $t_{1/2} = 862.1$  s.

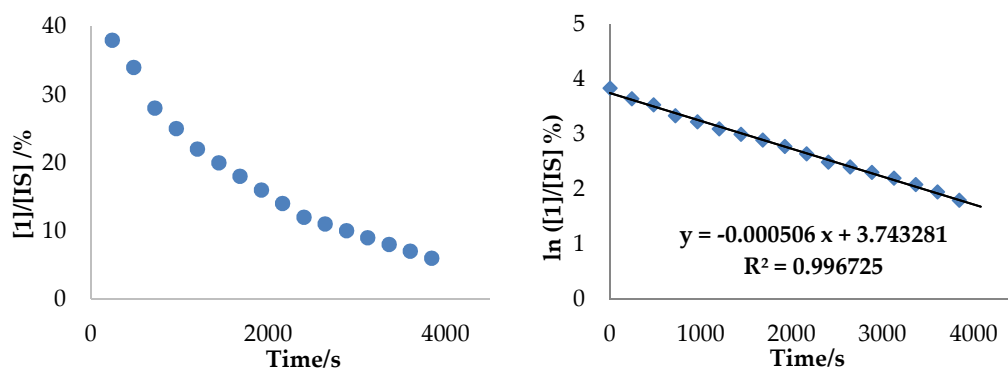

**Figure S15.** Kinetic data for **1** at 25 °C.  $t_{1/2} = 1369.9$  s.

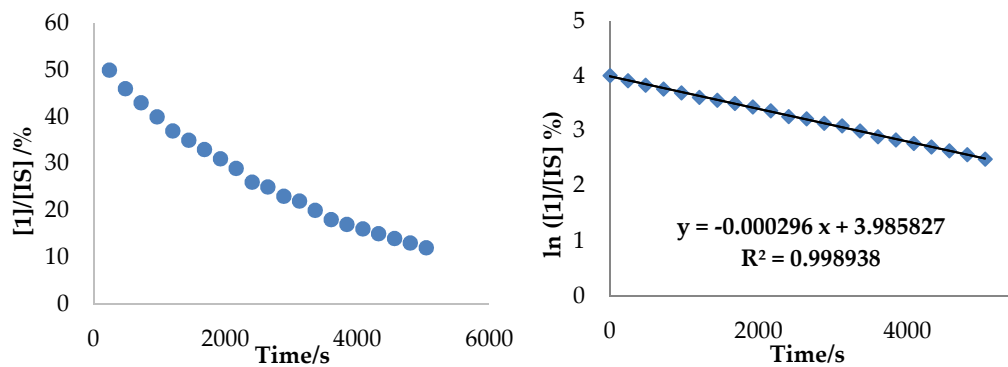

**Figure S16.** Kinetic data for **1** at 20 °C.  $t_{1/2} = 2341.7$  s.

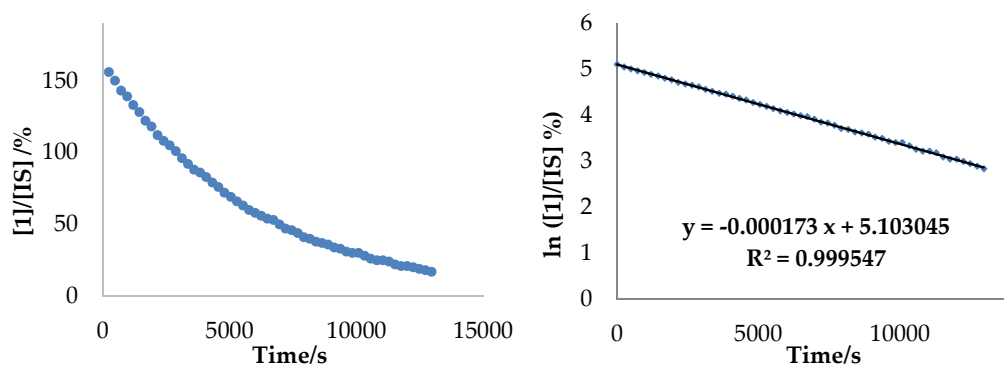

**Figure S17.** Kinetic data for **1** at 15 °C.  $t_{1/2} = 4006.6$  s.

**Table S2.** Eyring Plot data for **1**.

| T (°C) | T (K)  | 1/T (K <sup>-1</sup> ) | k (s <sup>-1</sup> ) | k/T (s <sup>-1</sup> K <sup>-1</sup> ) | ln (k/T)   | t <sub>1/2</sub> (s) |
|--------|--------|------------------------|----------------------|----------------------------------------|------------|----------------------|
| 35     | 308.15 | 0.003245173            | 0.00128              | 4.15382E-06                            | -12.391482 | 541.5                |
| 30     | 303.15 | 0.003298697            | 0.000804             | 2.65215E-06                            | -12.840139 | 862.1                |
| 25     | 298.15 | 0.003354016            | 0.000506             | 1.69713E-06                            | -13.286571 | 1369.9               |
| 20     | 293.15 | 0.003411223            | 0.000296             | 1.00972E-06                            | -13.805836 | 2341.7               |
| 15     | 288.15 | 0.003470415            | 0.000173             | 6.00382E-07                            | -14.3257   | 4006.6               |

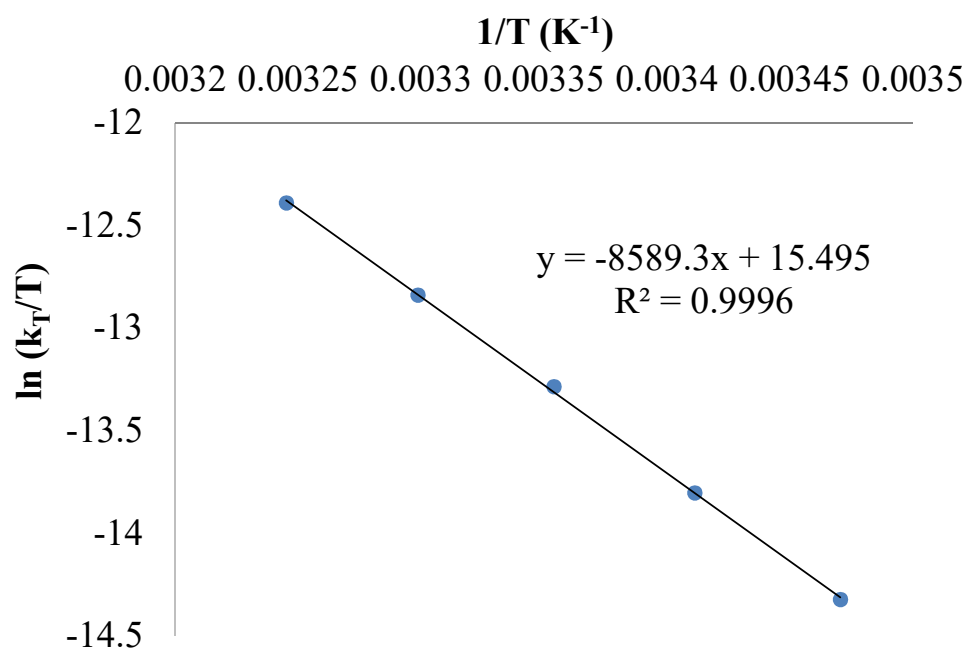

$$\Delta H^\ddagger = 71.41 \text{ kJ mol}^{-1} (17.06 \text{ kcal.mol}^{-1})$$

$$\Delta S^\ddagger = -68.72 \text{ J mol}^{-1} \text{ K}^{-1} (-16.41 \text{ cal.mol}^{-1}.\text{K}^{-1})$$

**Figure S18.** Eyring Plot and resulting  $\Delta H^\ddagger$  and  $\Delta S^\ddagger$  for **1**.

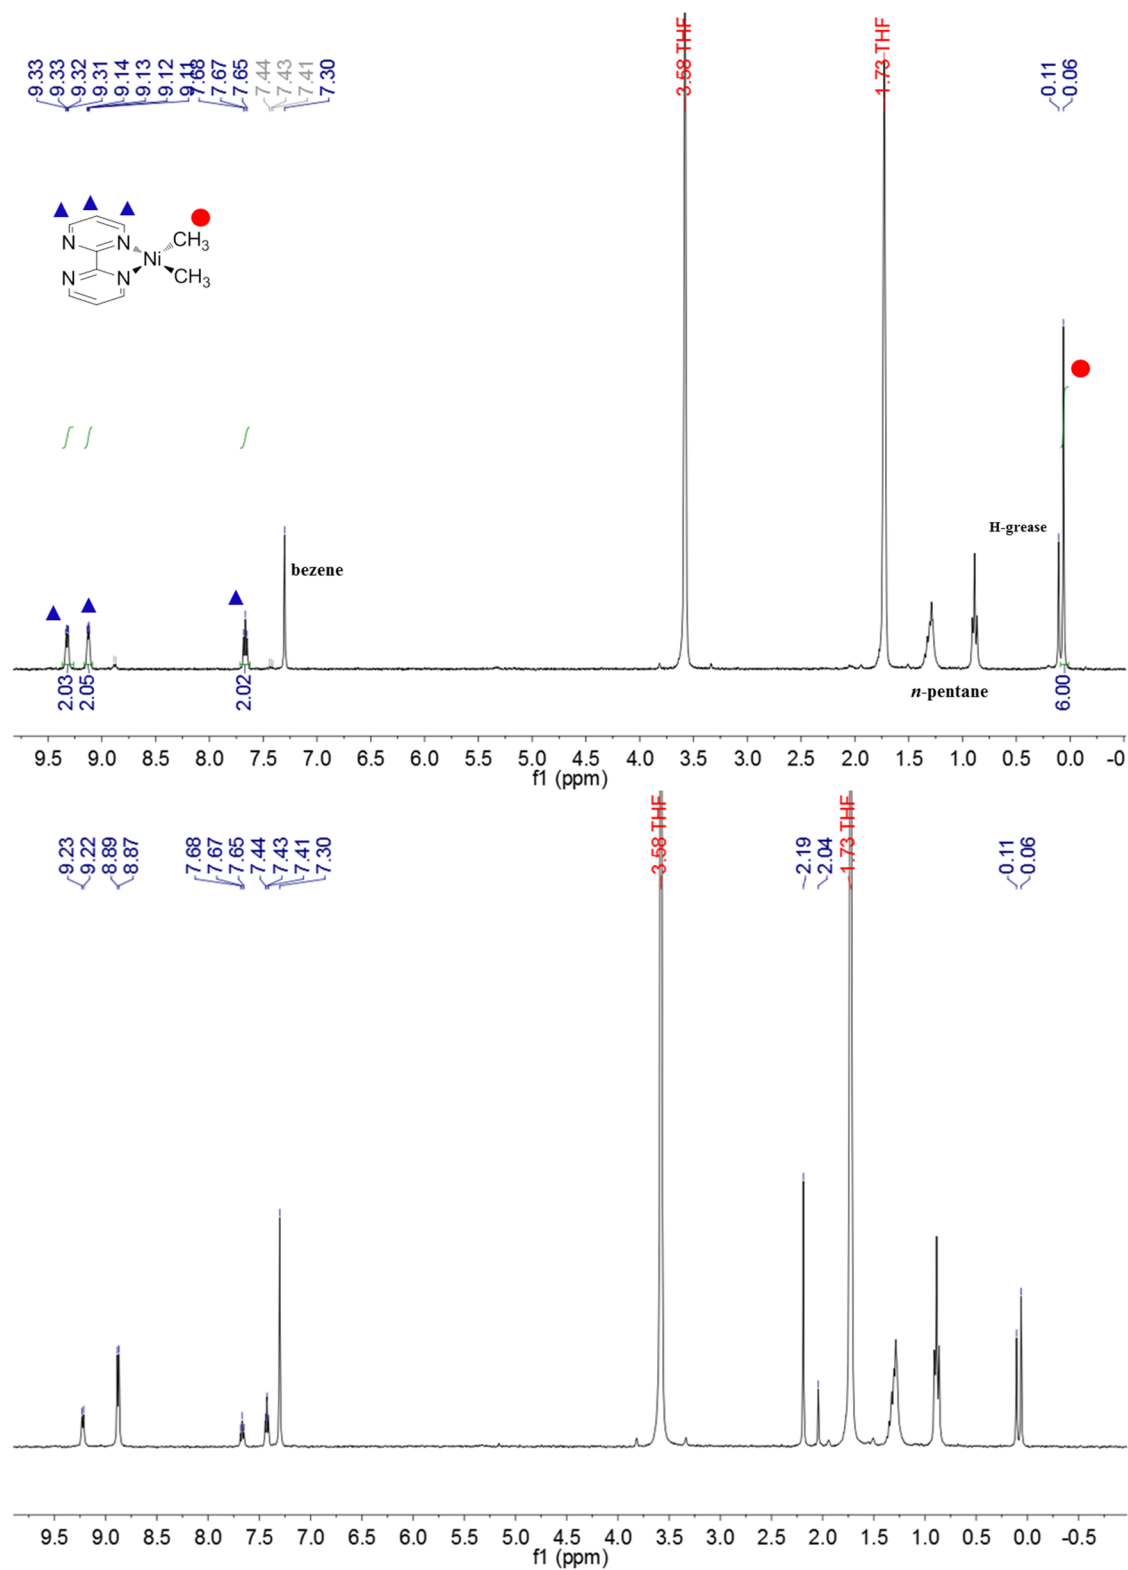

**Figure S19A.**  $^1\text{H}$  NMR of **1** in  $\text{thf-d}_8$  at 293 K (**a**) before addition of CO (**b**) after addition of CO (continued).

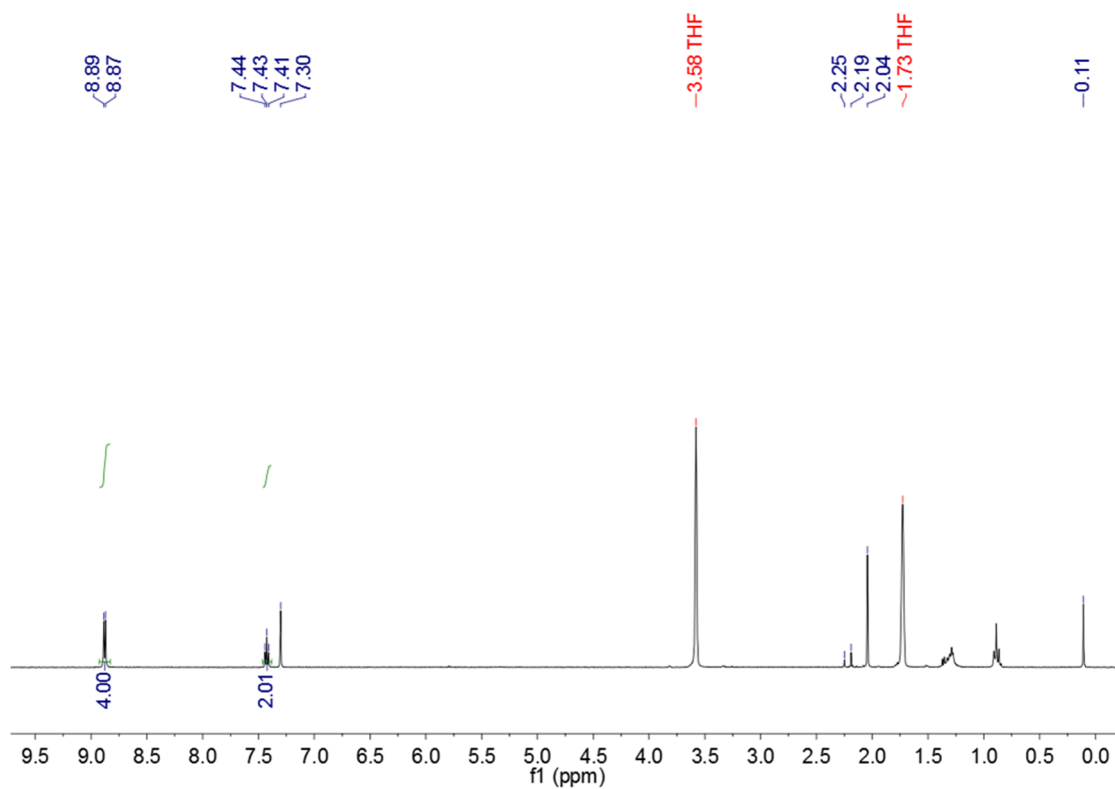

**Figure S19B.** <sup>1</sup>H NMR of **1** in thf-d<sub>8</sub> at 293 K (c) after the reaction with CO.

### III. Magnetism

Magnetic properties of the compounds were measured on crushed crystals in sealed quartz tubes.

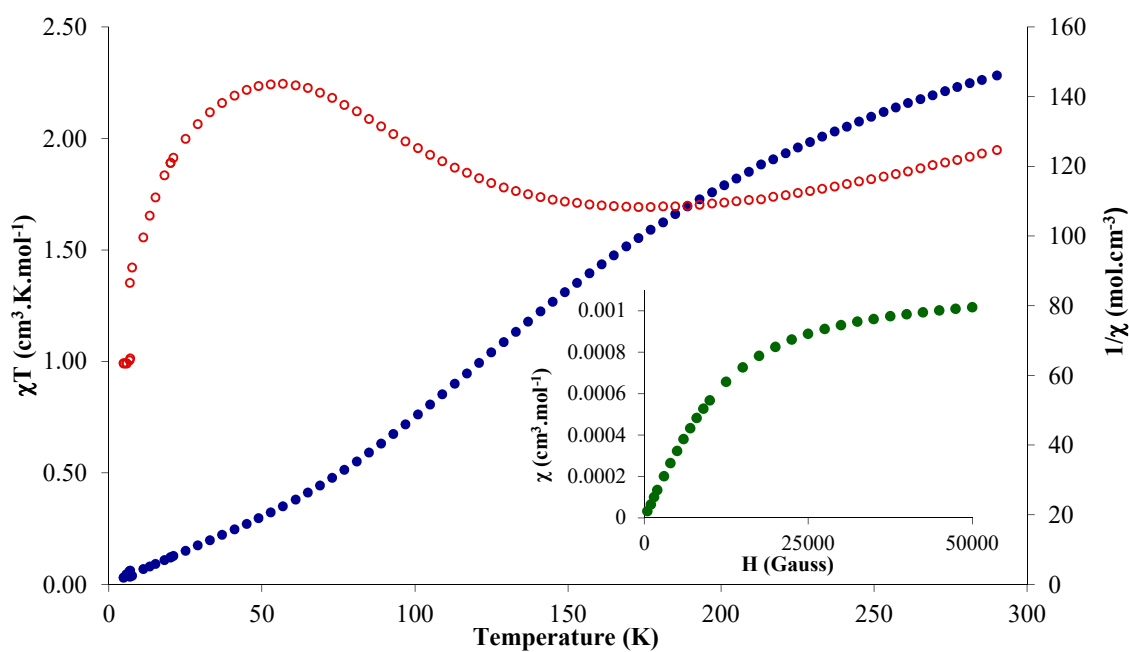

**Figure S20.** Temperature dependent magnetic data for 2 at 0.2T.  $1/\chi$  vs T is given as unfilled red dots,  $\chi T$  vs T as filled blue dots. Inset show magnetization vs H at 5K.

## IV. Crystallographic data

**Table S3.** Crystallographic data for (bipym)NiMe<sub>2</sub> (1) and Cp\*<sub>2</sub>Yb(bipym)NiMe<sub>2</sub> (2).

| Compound                                    | (bipym)NiMe <sub>2</sub> (1)                        | Cp* <sub>2</sub> Yb(bipym)NiMe <sub>2</sub> (2)                                        |
|---------------------------------------------|-----------------------------------------------------|----------------------------------------------------------------------------------------|
| Molecular formula                           | 'C <sub>10</sub> H <sub>12</sub> N <sub>4</sub> Ni' | 'C <sub>30</sub> H <sub>42</sub> N <sub>4</sub> Ni Yb, C <sub>7</sub> H <sub>8</sub> ' |
| Molecular weight                            | 246.95                                              | 782.56                                                                                 |
| Crystal habit                               | black needle                                        | red purple plate                                                                       |
| Crystal dimensions(mm)                      | 0.300x0.040x0.020                                   | 0.280x0.140x0.100                                                                      |
| Crystal system                              | monoclinic                                          | triclinic                                                                              |
| Space group                                 | C 2/c                                               | P -1                                                                                   |
| a(Å)                                        | 9.5916(10)                                          | 9.4362(7)                                                                              |
| b(Å)                                        | 33.666(3)                                           | 10.7558(7)                                                                             |
| c(Å)                                        | 13.3219(13)                                         | 17.0271(12)                                                                            |
| α(°)                                        | 90                                                  | 103.204(2)                                                                             |
| β(°)                                        | 105.255(3)                                          | 94.650(2)                                                                              |
| γ(°)                                        | 90                                                  | 93.872(2)                                                                              |
| V(Å <sup>3</sup> )                          | 4150.2(7)                                           | 1670.3(2)                                                                              |
| Z                                           | 16                                                  | 2                                                                                      |
| d(g·cm <sup>-3</sup> )                      | 1.581                                               | 1.556                                                                                  |
| F(000)                                      | 2048                                                | 796                                                                                    |
| m(cm <sup>-1</sup> )                        | 1.839                                               | 3.377                                                                                  |
| Absorption corrections                      | multi-scan; 0.6496 min, 0.7456 max                  | multi-scan; 0.6046 min, 0.7456 max                                                     |
| Diffractionmeter                            | Kappa APEX II                                       | Kappa APEX II                                                                          |
| X-ray source                                | MoKa                                                | MoKa                                                                                   |
| λ(Å)                                        | MoKa                                                | 0.71069                                                                                |
| Monochromator                               | graphite                                            | graphite                                                                               |
| T (K)                                       | 150.0(1)                                            | 150.0(1)                                                                               |
| Scan mode                                   | phi and omega scans                                 | phi and omega scans                                                                    |
| Maximum q                                   | 25.68                                               | 26.369                                                                                 |
| HKL ranges                                  | -11 11 ; -40 40 ; -13 16                            | -11 11 ; -13 13 ; -21 21                                                               |
| Reflections measured                        | 13457                                               | 26666                                                                                  |
| Unique data                                 | 3910                                                | 6781                                                                                   |
| Rint                                        | 0.0379                                              | 0.045                                                                                  |
| Reflections used                            | 3204                                                | 6241                                                                                   |
| Criterion                                   | I > 2(I)                                            | I > 2σ(I)                                                                              |
| Refinement type                             | Fsqd                                                | Fsqd                                                                                   |
| Hydrogen atoms                              | constr                                              | constr                                                                                 |
| Parameters refined                          | 275                                                 | 404                                                                                    |
| Reflections / parameter                     | 11                                                  | 15                                                                                     |
| wR2                                         | 0.0793                                              | 0.0588                                                                                 |
| Flack's parameter                           | 0.0308                                              | 0.0236                                                                                 |
| Weights a, b                                | 0.0391 ; 2.5054                                     | 0.0346 ; 0.1167                                                                        |
| GoF                                         | 1.038                                               | 0.945                                                                                  |
| difference peak / hole (e Å <sup>-3</sup> ) | 0.376(0.062) / -0.244(0.062)                        | 0.538(0.092) / -0.427(0.092)                                                           |

**Table S4.** Average main distances (Å) and angles (°) for (bipym)NiMe<sub>2</sub> (**1**) and (Cp\*)<sub>2</sub>Yb(bipym)NiMe<sub>2</sub> (**2**).

| Atoms                        | 1         | 2        |
|------------------------------|-----------|----------|
| Ni-Me                        | 1.930(3)  | 1.925(1) |
| Ni-N                         | 1.959(2)  | 1.956(3) |
| C-C <sub>bipym</sub>         | 1.482(5)  | 1.403(4) |
| Yb-N                         | -         | 2.359(1) |
| Yb-Cp* <sub>ctr</sub>        | -         | 2.31(1)  |
| Me-Ni-Me <sup>^</sup> N-Ni-N | 5.34±0.24 | 1.80     |

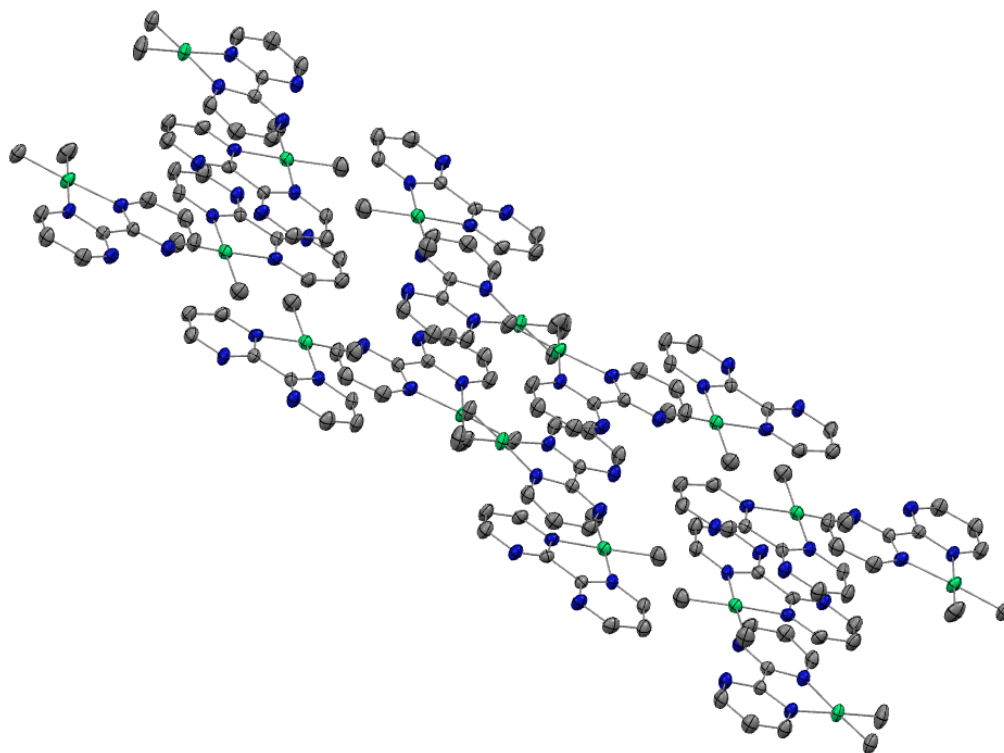**Figure S21.** Packing diagram of (bipym)NiMe<sub>2</sub> (**1**). Thermal ellipsoids are at 50 % level. Carbon atoms are in grey, hydrogen atoms in grey, nitrogen atoms in blue. Hydrogen atoms are not shown for clarity.



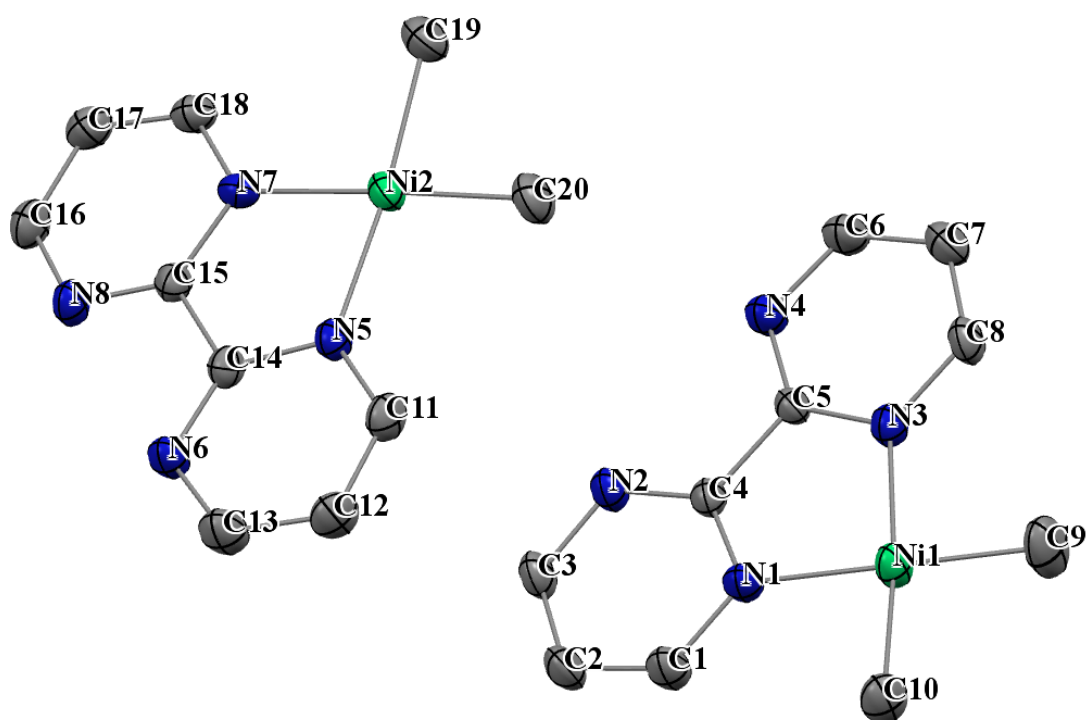

**Figure S22.** ORTEP asymmetric unit of (bipym)NiMe<sub>2</sub> (**1**). Thermal ellipsoids are at 50 % level. Carbon atoms are in grey, hydrogen atoms in grey, nitrogen atoms in blue. Hydrogen atoms are not shown for clarity.

**Table S5.** Bond lengths (Å) and angles (deg) for (bipym)NiMe<sub>2</sub> (**1**).

|              |          |              |          |
|--------------|----------|--------------|----------|
| Ni(1)-C(9)   | 1.927(3) | Ni(1)-C(10)  | 1.930(3) |
| Ni(1)-N(1)   | 1.956(2) | Ni(1)-N(3)   | 1.963(2) |
| N(1)-C(1)    | 1.347(3) | N(1)-C(4)    | 1.358(3) |
| N(2)-C(4)    | 1.331(3) | N(2)-C(3)    | 1.335(3) |
| N(3)-C(5)    | 1.352(3) | N(3)-C(8)    | 1.356(3) |
| N(4)-C(5)    | 1.329(3) | N(4)-C(6)    | 1.338(3) |
| C(1)-C(2)    | 1.368(4) | C(1)-H(1)    | 0.9500   |
| C(2)-C(3)    | 1.381(4) | C(2)-H(2)    | 0.9500   |
| C(3)-H(3)    | 0.9500   | C(4)-C(5)    | 1.477(3) |
| C(6)-C(7)    | 1.375(4) | C(6)-H(6)    | 0.9500   |
| C(7)-C(8)    | 1.372(4) | C(7)-H(7)    | 0.9500   |
| C(8)-H(8)    | 0.9500   | C(9)-H(9A)   | 0.9800   |
| C(9)-H(9B)   | 0.9800   | C(9)-H(9C)   | 0.9800   |
| C(10)-H(10A) | 0.9800   | C(10)-H(10B) | 0.9800   |
| C(10)-H(10C) | 0.9800   | Ni(2)-C(20)  | 1.927(3) |
| Ni(2)-C(19)  | 1.934(3) | Ni(2)-N(5)   | 1.957(2) |
| Ni(2)-N(7)   | 1.959(2) | N(5)-C(11)   | 1.356(3) |
| N(5)-C(14)   | 1.359(3) | N(6)-C(14)   | 1.319(3) |
| N(6)-C(13)   | 1.343(3) | N(7)-C(18)   | 1.351(3) |
| N(7)-C(15)   | 1.351(3) | N(8)-C(15)   | 1.328(3) |
| N(8)-C(16)   | 1.340(3) | C(11)-C(12)  | 1.367(4) |
| C(11)-H(11)  | 0.9500   | C(12)-C(13)  | 1.374(4) |
| C(12)-H(12)  | 0.9500   | C(13)-H(13)  | 0.9500   |
| C(14)-C(15)  | 1.487(3) | C(16)-C(17)  | 1.376(3) |
| C(16)-H(16)  | 0.9500   | C(17)-C(18)  | 1.373(3) |
| C(17)-H(17)  | 0.9500   | C(18)-H(18)  | 0.9500   |

|              |        |
|--------------|--------|
| C(19)-H(19A) | 0.9800 |
| C(19)-H(19C) | 0.9800 |
| C(20)-H(20B) | 0.9800 |

|              |        |
|--------------|--------|
| C(19)-H(19B) | 0.9800 |
| C(20)-H(20A) | 0.9800 |
| C(20)-H(20C) | 0.9800 |

|                     |          |
|---------------------|----------|
| C(9)-Ni(1)-C(10)    | 87.6(1)  |
| C(10)-Ni(1)-N(1)    | 94.6(1)  |
| C(10)-Ni(1)-N(3)    | 174.1(1) |
| C(1)-N(1)-C(4)      | 115.0(2) |
| C(4)-N(1)-Ni(1)     | 115.3(2) |
| C(5)-N(3)-C(8)      | 115.1(2) |
| C(8)-N(3)-Ni(1)     | 129.1(2) |
| N(1)-C(1)-C(2)      | 122.6(2) |
| C(2)-C(1)-H(1)      | 118.7    |
| C(1)-C(2)-H(2)      | 121.3    |
| N(2)-C(3)-C(2)      | 122.4(2) |
| C(2)-C(3)-H(3)      | 118.8    |
| N(2)-C(4)-C(5)      | 119.5(2) |
| N(4)-C(5)-N(3)      | 127.1(2) |
| N(3)-C(5)-C(4)      | 113.4(2) |
| N(4)-C(6)-H(6)      | 118.6    |
| C(8)-C(7)-C(6)      | 117.4(2) |
| C(6)-C(7)-H(7)      | 121.3    |
| N(3)-C(8)-H(8)      | 119.0    |
| Ni(1)-C(9)-H(9A)    | 109.5    |
| H(9A)-C(9)-H(9B)    | 109.5    |
| H(9A)-C(9)-H(9C)    | 109.5    |
| Ni(1)-C(10)-H(10A)  | 109.5    |
| H(10A)-C(10)-H(10B) | 109.5    |
| H(10A)-C(10)-H(10C) | 109.5    |
| C(20)-Ni(2)-C(19)   | 87.0(1)  |
| C(19)-Ni(2)-N(5)    | 174.3(1) |
| C(19)-Ni(2)-N(7)    | 94.7(1)  |
| C(11)-N(5)-C(14)    | 114.4(2) |
| C(14)-N(5)-Ni(2)    | 115.7(2) |
| C(18)-N(7)-C(15)    | 115.1(2) |
| C(15)-N(7)-Ni(2)    | 115.5(2) |
| N(5)-C(11)-C(12)    | 122.3(2) |
| C(12)-C(11)-H(11)   | 118.9    |
| C(11)-C(12)-H(12)   | 121.0    |
| N(6)-C(13)-C(12)    | 122.0(2) |
| C(12)-C(13)-H(13)   | 119.0    |
| N(6)-C(14)-C(15)    | 119.8(2) |
| N(8)-C(15)-N(7)     | 127.1(2) |
| N(7)-C(15)-C(14)    | 113.9(2) |
| N(8)-C(16)-H(16)    | 118.6    |
| C(18)-C(17)-C(16)   | 117.1(2) |
| C(16)-C(17)-H(17)   | 121.4    |
| N(7)-C(18)-H(18)    | 118.8    |
| Ni(2)-C(19)-H(19A)  | 109.5    |
| H(19A)-C(19)-H(19B) | 109.5    |
| H(19A)-C(19)-H(19C) | 109.5    |
| Ni(2)-C(20)-H(20A)  | 109.5    |
| H(20A)-C(20)-H(20B) | 109.5    |
| H(20A)-C(20)-H(20C) | 109.5    |

|                     |          |
|---------------------|----------|
| C(9)-Ni(1)-N(1)     | 176.5(1) |
| C(9)-Ni(1)-N(3)     | 96.3(1)  |
| N(1)-Ni(1)-N(3)     | 81.73(8) |
| C(1)-N(1)-Ni(1)     | 129.6(2) |
| C(4)-N(2)-C(3)      | 116.0(2) |
| C(5)-N(3)-Ni(1)     | 115.6(2) |
| C(5)-N(4)-C(6)      | 115.6(2) |
| N(1)-C(1)-H(1)      | 118.7    |
| C(1)-C(2)-C(3)      | 117.3(2) |
| C(3)-C(2)-H(2)      | 121.3    |
| N(2)-C(3)-H(3)      | 118.8    |
| N(2)-C(4)-N(1)      | 126.7(2) |
| N(1)-C(4)-C(5)      | 113.9(2) |
| N(4)-C(5)-C(4)      | 119.5(2) |
| N(4)-C(6)-C(7)      | 122.8(2) |
| C(7)-C(6)-H(6)      | 118.6    |
| C(8)-C(7)-H(7)      | 121.3    |
| N(3)-C(8)-C(7)      | 122.0(2) |
| C(7)-C(8)-H(8)      | 119.0    |
| Ni(1)-C(9)-H(9B)    | 109.5    |
| Ni(1)-C(9)-H(9C)    | 109.5    |
| H(9B)-C(9)-H(9C)    | 109.5    |
| Ni(1)-C(10)-H(10B)  | 109.5    |
| Ni(1)-C(10)-H(10C)  | 109.5    |
| H(10B)-C(10)-H(10C) | 109.5    |
| C(20)-Ni(2)-N(5)    | 96.7(1)  |
| C(20)-Ni(2)-N(7)    | 177.4(1) |
| N(5)-Ni(2)-N(7)     | 81.82(8) |
| C(11)-N(5)-Ni(2)    | 129.8(2) |
| C(14)-N(6)-C(13)    | 116.0(2) |
| C(18)-N(7)-Ni(2)    | 129.4(2) |
| C(15)-N(8)-C(16)    | 115.5(2) |
| N(5)-C(11)-H(11)    | 118.9    |
| C(11)-C(12)-C(13)   | 117.9(2) |
| C(13)-C(12)-H(12)   | 121.0    |
| N(6)-C(13)-H(13)    | 119.0    |
| N(6)-C(14)-N(5)     | 127.3(2) |
| N(5)-C(14)-C(15)    | 112.9(2) |
| N(8)-C(15)-C(14)    | 119.0(2) |
| N(8)-C(16)-C(17)    | 122.8(2) |
| C(17)-C(16)-H(16)   | 118.6    |
| C(18)-C(17)-H(17)   | 121.4    |
| N(7)-C(18)-C(17)    | 122.3(2) |
| C(17)-C(18)-H(18)   | 118.8    |
| Ni(2)-C(19)-H(19B)  | 109.5    |
| Ni(2)-C(19)-H(19C)  | 109.5    |
| H(19B)-C(19)-H(19C) | 109.5    |
| Ni(2)-C(20)-H(20B)  | 109.5    |
| Ni(2)-C(20)-H(20C)  | 109.5    |
| H(20B)-C(20)-H(20C) | 109.5    |

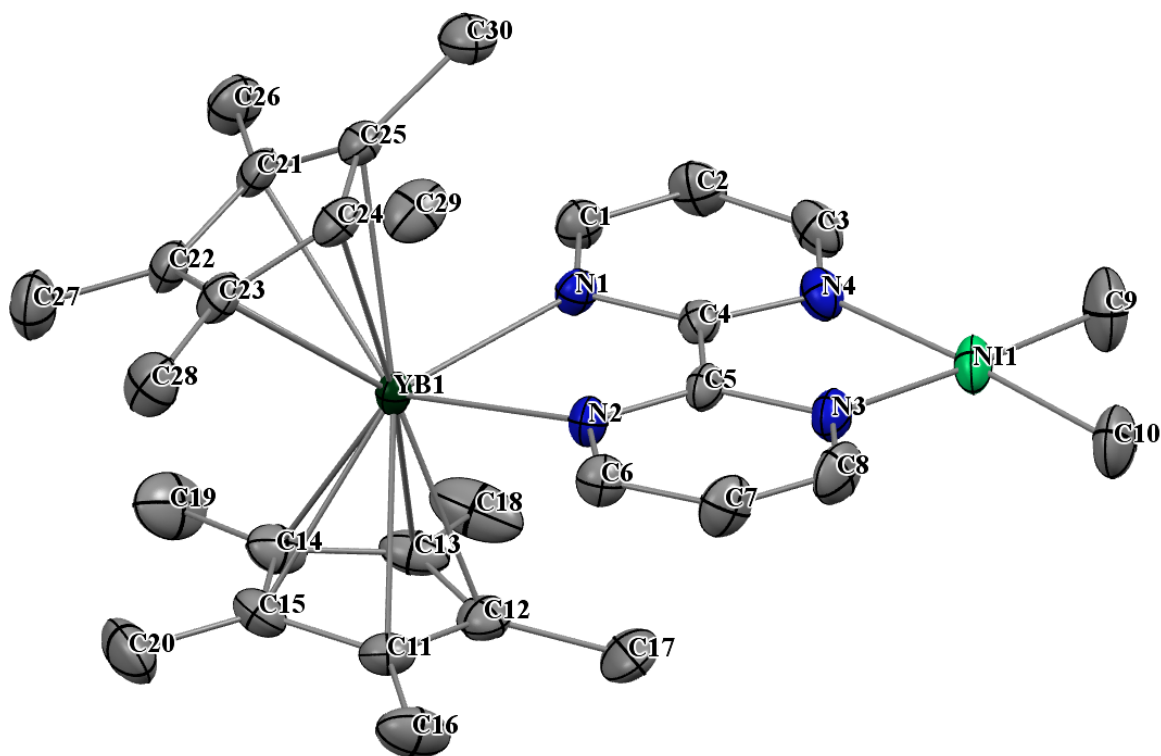

**Figure S23.** ORTEP asymmetric unit of  $\text{Cp}^*_2\text{Yb}(\text{bipym})\text{NiMe}_2$  (**2**). Thermal ellipsoids are at 50 % level. Carbon atoms are in grey, hydrogen atoms in grey, nitrogen atoms in blue. Hydrogen atoms and solvent molecules are not shown for clarity.

**Table S6.** Bond lengths (Å) and angles (deg) for  $\text{Cp}^*_2\text{Yb}(\text{bipym})\text{NiMe}_2$  (**2**).

|              |          |              |          |
|--------------|----------|--------------|----------|
| Yb(1)-N(2)   | 2.358(2) | Yb(1)-N(1)   | 2.359(2) |
| Yb(1)-C(21)  | 2.585(3) | Yb(1)-C(11)  | 2.592(3) |
| Yb(1)-C(15)  | 2.598(3) | Yb(1)-C(22)  | 2.600(3) |
| Yb(1)-C(12)  | 2.604(3) | Yb(1)-C(13)  | 2.605(3) |
| Yb(1)-C(14)  | 2.606(3) | Yb(1)-C(25)  | 2.617(3) |
| Yb(1)-C(23)  | 2.620(3) | Yb(1)-C(24)  | 2.627(3) |
| Ni(1)-C(9)   | 1.924(3) | Ni(1)-C(10)  | 1.925(3) |
| Ni(1)-N(3)   | 1.953(3) | Ni(1)-N(4)   | 1.959(2) |
| N(1)-C(1)    | 1.339(3) | N(1)-C(4)    | 1.382(4) |
| N(2)-C(6)    | 1.340(3) | N(2)-C(5)    | 1.373(4) |
| N(3)-C(8)    | 1.338(4) | N(3)-C(5)    | 1.372(4) |
| N(4)-C(3)    | 1.320(4) | N(4)-C(4)    | 1.378(4) |
| C(1)-C(2)    | 1.372(4) | C(1)-H(1)    | 0.9500   |
| C(2)-C(3)    | 1.390(4) | C(2)-H(2)    | 0.9500   |
| C(3)-H(3)    | 0.9500   | C(4)-C(5)    | 1.403(4) |
| C(6)-C(7)    | 1.378(4) | C(6)-H(6)    | 0.9500   |
| C(7)-C(8)    | 1.376(5) | C(7)-H(7)    | 0.9500   |
| C(8)-H(8)    | 0.9500   | C(9)-H(9A)   | 0.9800   |
| C(9)-H(9B)   | 0.9800   | C(9)-H(9C)   | 0.9800   |
| C(10)-H(10A) | 0.9800   | C(10)-H(10B) | 0.9800   |
| C(10)-H(10C) | 0.9800   | C(11)-C(15)  | 1.405(4) |
| C(11)-C(12)  | 1.419(4) | C(11)-C(16)  | 1.501(4) |
| C(12)-C(13)  | 1.421(4) | C(12)-C(17)  | 1.492(4) |
| C(13)-C(14)  | 1.407(5) | C(13)-C(18)  | 1.504(4) |
| C(14)-C(15)  | 1.426(4) | C(14)-C(19)  | 1.499(4) |

|              |          |              |          |
|--------------|----------|--------------|----------|
| C(15)-C(20)  | 1.504(4) | C(16)-H(16A) | 0.9800   |
| C(16)-H(16B) | 0.9800   | C(16)-H(16C) | 0.9800   |
| C(17)-H(17A) | 0.9800   | C(17)-H(17B) | 0.9800   |
| C(17)-H(17C) | 0.9800   | C(18)-H(18A) | 0.9800   |
| C(18)-H(18B) | 0.9800   | C(18)-H(18C) | 0.9800   |
| C(19)-H(19A) | 0.9800   | C(19)-H(19B) | 0.9800   |
| C(19)-H(19C) | 0.9800   | C(20)-H(20A) | 0.9800   |
| C(20)-H(20B) | 0.9800   | C(20)-H(20C) | 0.9800   |
| C(21)-C(25)  | 1.409(4) | C(21)-C(22)  | 1.413(4) |
| C(21)-C(26)  | 1.507(4) | C(22)-C(23)  | 1.421(4) |
| C(22)-C(27)  | 1.505(4) | C(23)-C(24)  | 1.410(4) |
| C(23)-C(28)  | 1.506(4) | C(24)-C(25)  | 1.424(4) |
| C(24)-C(29)  | 1.496(4) | C(25)-C(30)  | 1.492(4) |
| C(26)-H(26A) | 0.9800   | C(26)-H(26B) | 0.9800   |
| C(26)-H(26C) | 0.9800   | C(27)-H(27A) | 0.9800   |
| C(27)-H(27B) | 0.9800   | C(27)-H(27C) | 0.9800   |
| C(28)-H(28A) | 0.9800   | C(28)-H(28B) | 0.9800   |
| C(28)-H(28C) | 0.9800   | C(29)-H(29A) | 0.9800   |
| C(29)-H(29B) | 0.9800   | C(29)-H(29C) | 0.9800   |
| C(30)-H(30A) | 0.9800   | C(30)-H(30B) | 0.9800   |
| C(30)-H(30C) | 0.9800   | C(31)-C(32)  | 1.3900   |
| C(31)-C(36)  | 1.3900   | C(31)-H(31)  | 0.9500   |
| C(32)-C(33)  | 1.3900   | C(32)-H(32)  | 0.9500   |
| C(33)-C(34)  | 1.3900   | C(33)-H(33)  | 0.9500   |
| C(34)-C(35)  | 1.3900   | C(34)-H(34)  | 0.9500   |
| C(35)-C(36)  | 1.3900   | C(35)-H(35)  | 0.9500   |
| C(36)-C(37)  | 1.45(1)  | C(37)-H(37A) | 0.9800   |
| C(37)-H(37B) | 0.9800   | C(37)-H(37C) | 0.9800   |
| C(38)-C(44)  | 1.06(1)  | C(38)-C(39)  | 1.3900   |
| C(38)-C(43)  | 1.3900   | C(39)-C(40)  | 1.3900   |
| C(39)-H(39)  | 0.9500   | C(40)-C(41)  | 1.3900   |
| C(40)-H(40)  | 0.9500   | C(41)-C(42)  | 1.3900   |
| C(41)-H(41)  | 0.9500   | C(42)-C(43)  | 1.3900   |
| C(42)-H(42)  | 0.9500   | C(43)-H(43)  | 0.9500   |
| C(44)-H(44A) | 0.9800   | C(44)-H(44B) | 0.9800   |
| C(44)-H(44C) | 0.9800   |              |          |

|                   |          |                   |          |
|-------------------|----------|-------------------|----------|
| N(2)-Yb(1)-N(1)   | 71.94(8) | N(2)-Yb(1)-C(21)  | 124.5(1) |
| N(1)-Yb(1)-C(21)  | 90.59(8) | N(2)-Yb(1)-C(11)  | 84.6(1)  |
| N(1)-Yb(1)-C(11)  | 116.2(1) | C(21)-Yb(1)-C(11) | 146.6(1) |
| N(2)-Yb(1)-C(15)  | 115.0(1) | N(1)-Yb(1)-C(15)  | 131.6(1) |
| C(21)-Yb(1)-C(15) | 115.6(1) | C(11)-Yb(1)-C(15) | 31.4(1)  |
| N(2)-Yb(1)-C(22)  | 132.0(1) | N(1)-Yb(1)-C(22)  | 122.2(1) |
| C(21)-Yb(1)-C(22) | 31.6(1)  | C(11)-Yb(1)-C(22) | 117.6(1) |
| C(15)-Yb(1)-C(22) | 89.8(1)  | N(2)-Yb(1)-C(12)  | 80.3(1)  |
| N(1)-Yb(1)-C(12)  | 85.3(1)  | C(21)-Yb(1)-C(12) | 152.0(1) |
| C(11)-Yb(1)-C(12) | 31.7(1)  | C(15)-Yb(1)-C(12) | 52.2(1)  |
| C(22)-Yb(1)-C(12) | 140.7(1) | N(2)-Yb(1)-C(13)  | 107.9(1) |
| N(1)-Yb(1)-C(13)  | 79.7(1)  | C(21)-Yb(1)-C(13) | 120.4(1) |
| C(11)-Yb(1)-C(13) | 52.3(1)  | C(15)-Yb(1)-C(13) | 52.1(1)  |
| C(22)-Yb(1)-C(13) | 119.5(1) | C(12)-Yb(1)-C(13) | 31.6(1)  |
| N(2)-Yb(1)-C(14)  | 132.1(1) | N(1)-Yb(1)-C(14)  | 106.1(1) |
| C(21)-Yb(1)-C(14) | 103.1(1) | C(11)-Yb(1)-C(14) | 52.4(1)  |
| C(15)-Yb(1)-C(14) | 31.8(1)  | C(22)-Yb(1)-C(14) | 90.8(1)  |
| C(12)-Yb(1)-C(14) | 52.3(1)  | C(13)-Yb(1)-C(14) | 31.3(1)  |
| N(2)-Yb(1)-C(25)  | 93.1(1)  | N(1)-Yb(1)-C(25)  | 80.2(1)  |
| C(21)-Yb(1)-C(25) | 31.4(1)  | C(11)-Yb(1)-C(25) | 161.4(1) |

|                     |          |                     |          |
|---------------------|----------|---------------------|----------|
| C(15)-Yb(1)-C(25)   | 141.7(1) | C(22)-Yb(1)-C(25)   | 52.0(1)  |
| C(12)-Yb(1)-C(25)   | 165.3(1) | C(13)-Yb(1)-C(25)   | 144.6(1) |
| C(14)-Yb(1)-C(25)   | 134.5(1) | N(2)-Yb(1)-C(23)    | 102.5(1) |
| N(1)-Yb(1)-C(23)    | 131.9(1) | C(21)-Yb(1)-C(23)   | 52.3(1)  |
| C(11)-Yb(1)-C(23)   | 110.4(1) | C(15)-Yb(1)-C(23)   | 94.8(1)  |
| C(22)-Yb(1)-C(23)   | 31.6(1)  | C(12)-Yb(1)-C(23)   | 142.1(1) |
| C(13)-Yb(1)-C(23)   | 142.2(1) | C(14)-Yb(1)-C(23)   | 111.0(1) |
| C(25)-Yb(1)-C(23)   | 52.0(1)  | N(2)-Yb(1)-C(24)    | 80.8(1)  |
| N(1)-Yb(1)-C(24)    | 103.7(1) | C(21)-Yb(1)-C(24)   | 52.1(1)  |
| C(11)-Yb(1)-C(24)   | 130.4(1) | C(15)-Yb(1)-C(24)   | 124.6(1) |
| C(22)-Yb(1)-C(24)   | 51.9(1)  | C(12)-Yb(1)-C(24)   | 155.4(1) |
| C(13)-Yb(1)-C(24)   | 171.3(1) | C(14)-Yb(1)-C(24)   | 141.1(1) |
| C(25)-Yb(1)-C(24)   | 31.5(1)  | C(23)-Yb(1)-C(24)   | 31.2(1)  |
| C(9)-Ni(1)-C(10)    | 89.3(2)  | C(9)-Ni(1)-N(3)     | 176.9(1) |
| C(10)-Ni(1)-N(3)    | 93.7(1)  | C(9)-Ni(1)-N(4)     | 93.9(1)  |
| C(10)-Ni(1)-N(4)    | 176.4(1) | N(3)-Ni(1)-N(4)     | 83.1(1)  |
| C(1)-N(1)-C(4)      | 115.9(2) | C(1)-N(1)-Yb(1)     | 130.4(2) |
| C(4)-N(1)-Yb(1)     | 113.3(2) | C(6)-N(2)-C(5)      | 116.4(2) |
| C(6)-N(2)-Yb(1)     | 129.4(2) | C(5)-N(2)-Yb(1)     | 113.6(2) |
| C(8)-N(3)-C(5)      | 115.6(3) | C(8)-N(3)-Ni(1)     | 131.4(2) |
| C(5)-N(3)-Ni(1)     | 113.0(2) | C(3)-N(4)-C(4)      | 116.2(3) |
| C(3)-N(4)-Ni(1)     | 131.5(2) | C(4)-N(4)-Ni(1)     | 112.3(2) |
| N(1)-C(1)-C(2)      | 122.7(3) | N(1)-C(1)-H(1)      | 118.6    |
| C(2)-C(1)-H(1)      | 118.6    | C(1)-C(2)-C(3)      | 117.7(3) |
| C(1)-C(2)-H(2)      | 121.2    | C(3)-C(2)-H(2)      | 121.2    |
| N(4)-C(3)-C(2)      | 123.0(3) | N(4)-C(3)-H(3)      | 118.5    |
| C(2)-C(3)-H(3)      | 118.5    | N(4)-C(4)-N(1)      | 124.4(2) |
| N(4)-C(4)-C(5)      | 115.9(3) | N(1)-C(4)-C(5)      | 119.7(3) |
| N(4)-C(4)-Yb(1)     | 164.9(2) | N(1)-C(4)-Yb(1)     | 43.1(1)  |
| C(5)-C(4)-Yb(1)     | 77.1(2)  | N(3)-C(5)-N(2)      | 124.6(2) |
| N(3)-C(5)-C(4)      | 115.5(3) | N(2)-C(5)-C(4)      | 119.9(2) |
| N(3)-C(5)-Yb(1)     | 165.1(2) | N(2)-C(5)-Yb(1)     | 43.0(1)  |
| C(4)-C(5)-Yb(1)     | 77.3(2)  | N(2)-C(6)-C(7)      | 122.5(3) |
| N(2)-C(6)-H(6)      | 118.8    | C(7)-C(6)-H(6)      | 118.8    |
| C(8)-C(7)-C(6)      | 117.3(3) | C(8)-C(7)-H(7)      | 121.3    |
| C(6)-C(7)-H(7)      | 121.3    | N(3)-C(8)-C(7)      | 123.5(3) |
| N(3)-C(8)-H(8)      | 118.3    | C(7)-C(8)-H(8)      | 118.3    |
| Ni(1)-C(9)-H(9A)    | 109.5    | Ni(1)-C(9)-H(9B)    | 109.5    |
| H(9A)-C(9)-H(9B)    | 109.5    | Ni(1)-C(9)-H(9C)    | 109.5    |
| H(9A)-C(9)-H(9C)    | 109.5    | H(9B)-C(9)-H(9C)    | 109.5    |
| Ni(1)-C(10)-H(10A)  | 109.5    | Ni(1)-C(10)-H(10B)  | 109.5    |
| H(10A)-C(10)-H(10B) | 109.5    | Ni(1)-C(10)-H(10C)  | 109.5    |
| H(10A)-C(10)-H(10C) | 109.5    | H(10B)-C(10)-H(10C) | 109.5    |
| C(15)-C(11)-C(12)   | 108.2(3) | C(15)-C(11)-C(16)   | 125.2(3) |
| C(12)-C(11)-C(16)   | 126.4(3) | C(15)-C(11)-Yb(1)   | 74.5(2)  |
| C(12)-C(11)-Yb(1)   | 74.6(2)  | C(16)-C(11)-Yb(1)   | 120.6(2) |
| C(11)-C(12)-C(13)   | 107.5(3) | C(11)-C(12)-C(17)   | 125.4(3) |
| C(13)-C(12)-C(17)   | 126.8(3) | C(11)-C(12)-Yb(1)   | 73.7(2)  |
| C(13)-C(12)-Yb(1)   | 74.2(2)  | C(17)-C(12)-Yb(1)   | 122.8(2) |
| C(14)-C(13)-C(12)   | 108.5(3) | C(14)-C(13)-C(18)   | 126.0(3) |
| C(12)-C(13)-C(18)   | 125.1(3) | C(14)-C(13)-Yb(1)   | 74.4(2)  |
| C(12)-C(13)-Yb(1)   | 74.1(2)  | C(18)-C(13)-Yb(1)   | 123.2(2) |
| C(13)-C(14)-C(15)   | 107.6(3) | C(13)-C(14)-C(19)   | 123.3(3) |
| C(15)-C(14)-C(19)   | 128.4(3) | C(13)-C(14)-Yb(1)   | 74.3(2)  |
| C(15)-C(14)-Yb(1)   | 73.8(2)  | C(19)-C(14)-Yb(1)   | 125.4(2) |
| C(11)-C(15)-C(14)   | 108.2(3) | C(11)-C(15)-C(20)   | 124.4(3) |
| C(14)-C(15)-C(20)   | 126.7(3) | C(11)-C(15)-Yb(1)   | 74.1(2)  |
| C(14)-C(15)-Yb(1)   | 74.4(2)  | C(20)-C(15)-Yb(1)   | 125.2(2) |

|                     |          |
|---------------------|----------|
| C(11)-C(16)-H(16A)  | 109.5    |
| H(16A)-C(16)-H(16B) | 109.5    |
| H(16A)-C(16)-H(16C) | 109.5    |
| C(12)-C(17)-H(17A)  | 109.5    |
| H(17A)-C(17)-H(17B) | 109.5    |
| H(17A)-C(17)-H(17C) | 109.5    |
| C(13)-C(18)-H(18A)  | 109.5    |
| H(18A)-C(18)-H(18B) | 109.5    |
| H(18A)-C(18)-H(18C) | 109.5    |
| C(14)-C(19)-H(19A)  | 109.5    |
| H(19A)-C(19)-H(19B) | 109.5    |
| H(19A)-C(19)-H(19C) | 109.5    |
| C(15)-C(20)-H(20A)  | 109.5    |
| H(20A)-C(20)-H(20B) | 109.5    |
| H(20A)-C(20)-H(20C) | 109.5    |
| C(25)-C(21)-C(22)   | 108.3(3) |
| C(22)-C(21)-C(26)   | 125.0(3) |
| C(22)-C(21)-Yb(1)   | 74.8(2)  |
| C(21)-C(22)-C(23)   | 108.0(3) |
| C(23)-C(22)-C(27)   | 126.4(3) |
| C(23)-C(22)-Yb(1)   | 75.0(2)  |
| C(24)-C(23)-C(22)   | 107.7(3) |
| C(22)-C(23)-C(28)   | 126.7(3) |
| C(22)-C(23)-Yb(1)   | 73.4(2)  |
| C(23)-C(24)-C(25)   | 108.2(3) |
| C(25)-C(24)-C(29)   | 125.1(3) |
| C(25)-C(24)-Yb(1)   | 73.9(2)  |
| C(21)-C(25)-C(24)   | 107.7(3) |
| C(24)-C(25)-C(30)   | 125.1(3) |
| C(24)-C(25)-Yb(1)   | 74.6(2)  |
| C(21)-C(26)-H(26A)  | 109.5    |
| H(26A)-C(26)-H(26B) | 109.5    |
| H(26A)-C(26)-H(26C) | 109.5    |
| C(22)-C(27)-H(27A)  | 109.5    |
| H(27A)-C(27)-H(27B) | 109.5    |
| H(27A)-C(27)-H(27C) | 109.5    |
| C(23)-C(28)-H(28A)  | 109.5    |
| H(28A)-C(28)-H(28B) | 109.5    |
| H(28A)-C(28)-H(28C) | 109.5    |
| C(24)-C(29)-H(29A)  | 109.5    |
| H(29A)-C(29)-H(29B) | 109.5    |
| H(29A)-C(29)-H(29C) | 109.5    |
| C(25)-C(30)-H(30A)  | 109.5    |
| H(30A)-C(30)-H(30B) | 109.5    |
| H(30A)-C(30)-H(30C) | 109.5    |
| C(32)-C(31)-C(36)   | 120.0    |
| C(36)-C(31)-H(31)   | 120.0    |
| C(31)-C(32)-H(32)   | 120.0    |
| C(34)-C(33)-C(32)   | 120.0    |
| C(32)-C(33)-H(33)   | 120.0    |
| C(35)-C(34)-H(34)   | 120.0    |
| C(36)-C(35)-C(34)   | 120.0    |
| C(34)-C(35)-H(35)   | 120.0    |
| C(35)-C(36)-C(37)   | 121.0(5) |
| C(36)-C(37)-H(37A)  | 109.5    |
| H(37A)-C(37)-H(37B) | 109.5    |
| H(37A)-C(37)-H(37C) | 109.5    |
| C(44)-C(38)-C(39)   | 123.3(8) |

|                     |          |
|---------------------|----------|
| C(11)-C(16)-H(16B)  | 109.5    |
| C(11)-C(16)-H(16C)  | 109.5    |
| H(16B)-C(16)-H(16C) | 109.5    |
| C(12)-C(17)-H(17B)  | 109.5    |
| C(12)-C(17)-H(17C)  | 109.5    |
| H(17B)-C(17)-H(17C) | 109.5    |
| C(13)-C(18)-H(18B)  | 109.5    |
| C(13)-C(18)-H(18C)  | 109.5    |
| H(18B)-C(18)-H(18C) | 109.5    |
| C(14)-C(19)-H(19B)  | 109.5    |
| C(14)-C(19)-H(19C)  | 109.5    |
| H(19B)-C(19)-H(19C) | 109.5    |
| C(15)-C(20)-H(20B)  | 109.5    |
| C(15)-C(20)-H(20C)  | 109.5    |
| H(20B)-C(20)-H(20C) | 109.5    |
| C(25)-C(21)-C(26)   | 126.4(3) |
| C(25)-C(21)-Yb(1)   | 75.6(2)  |
| C(26)-C(21)-Yb(1)   | 120.9(2) |
| C(21)-C(22)-C(27)   | 124.6(3) |
| C(21)-C(22)-Yb(1)   | 73.6(2)  |
| C(27)-C(22)-Yb(1)   | 125.8(2) |
| C(24)-C(23)-C(28)   | 125.3(3) |
| C(24)-C(23)-Yb(1)   | 74.7(2)  |
| C(28)-C(23)-Yb(1)   | 122.8(2) |
| C(23)-C(24)-C(29)   | 126.2(3) |
| C(23)-C(24)-Yb(1)   | 74.2(2)  |
| C(29)-C(24)-Yb(1)   | 124.0(2) |
| C(21)-C(25)-C(30)   | 126.9(3) |
| C(21)-C(25)-Yb(1)   | 73.0(2)  |
| C(30)-C(25)-Yb(1)   | 122.9(2) |
| C(21)-C(26)-H(26B)  | 109.5    |
| C(21)-C(26)-H(26C)  | 109.5    |
| H(26B)-C(26)-H(26C) | 109.5    |
| C(22)-C(27)-H(27B)  | 109.5    |
| C(22)-C(27)-H(27C)  | 109.5    |
| H(27B)-C(27)-H(27C) | 109.5    |
| C(23)-C(28)-H(28B)  | 109.5    |
| C(23)-C(28)-H(28C)  | 109.5    |
| H(28B)-C(28)-H(28C) | 109.5    |
| C(24)-C(29)-H(29B)  | 109.5    |
| C(24)-C(29)-H(29C)  | 109.5    |
| H(29B)-C(29)-H(29C) | 109.5    |
| C(25)-C(30)-H(30B)  | 109.5    |
| C(25)-C(30)-H(30C)  | 109.5    |
| H(30B)-C(30)-H(30C) | 109.5    |
| C(32)-C(31)-H(31)   | 120.0    |
| C(31)-C(32)-C(33)   | 120.0    |
| C(33)-C(32)-H(32)   | 120.0    |
| C(34)-C(33)-H(33)   | 120.0    |
| C(35)-C(34)-C(33)   | 120.0    |
| C(33)-C(34)-H(34)   | 120.0    |
| C(36)-C(35)-H(35)   | 120.0    |
| C(35)-C(36)-C(31)   | 120.0    |
| C(31)-C(36)-C(37)   | 120.0    |
| C(36)-C(37)-H(37B)  | 119.0(5) |
| C(36)-C(37)-H(37C)  | 109.5    |
| H(37B)-C(37)-H(37C) | 109.5    |
| C(44)-C(38)-C(43)   | 109.5    |

|                     |       |
|---------------------|-------|
| C(39)-C(38)-C(43)   | 120.0 |
| C(38)-C(39)-H(39)   | 120.0 |
| C(41)-C(40)-C(39)   | 120.0 |
| C(39)-C(40)-H(40)   | 120.0 |
| C(42)-C(41)-H(41)   | 120.0 |
| C(43)-C(42)-C(41)   | 120.0 |
| C(41)-C(42)-H(42)   | 120.0 |
| C(42)-C(43)-H(43)   | 120.0 |
| C(38)-C(44)-H(44A)  | 109.5 |
| H(44A)-C(44)-H(44B) | 109.5 |
| H(44A)-C(44)-H(44C) | 109.5 |

|                     |          |
|---------------------|----------|
| C(38)-C(39)-C(40)   | 116.6(8) |
| C(40)-C(39)-H(39)   | 120.0    |
| C(41)-C(40)-H(40)   | 120.0    |
| C(42)-C(41)-C(40)   | 120.0    |
| C(40)-C(41)-H(41)   | 120.0    |
| C(43)-C(42)-H(42)   | 120.0    |
| C(42)-C(43)-C(38)   | 120.0    |
| C(38)-C(43)-H(43)   | 120.0    |
| C(38)-C(44)-H(44B)  | 109.5    |
| C(38)-C(44)-H(44C)  | 109.5    |
| H(44B)-C(44)-H(44C) | 109.5    |

## V. DFT Calculation data

**Table S7.** Average main distances (Å) and angles (°) for (bipym)NiMe<sub>2</sub> (**1**) DFT optimized geometry with three different functional (PBE, PBE0 and TPSSH) vs XRD crystal structure.

| Atoms                                     | PBE   | PBE0  | TPSSH | XRD             |
|-------------------------------------------|-------|-------|-------|-----------------|
| Ni-C                                      | 1.916 | 1.899 | 1.911 | 1.930(3)        |
| Ni-N                                      | 1.951 | 1.967 | 1.953 | 1.959(2)        |
| C-C <sub>bipym</sub>                      | 1.471 | 1.472 | 1.469 | 1.482(5) (avg)  |
| Me-Ni-Me <sup>^</sup> N-Ni-N              | 9.41  | 16.90 | 13.11 | 5.34±0.24 (avg) |
| N-C-C <sup>^</sup> C-C-N <sub>bipym</sub> | 4.65  | 12.80 | 7.64  | 2.63±1.04 (avg) |

**Table S8.** Cartesian coordinates for the PBE optimized geometry.

|    |                   |                  |                  |
|----|-------------------|------------------|------------------|
| Ni | 1.02122660532342  | 3.14409386460801 | 2.98955432851006 |
| N  | 3.91360444234729  | 4.93868469680804 | 5.32137831697165 |
| N  | 3.15486436792260  | 6.66722934684548 | 3.21831859757962 |
| N  | 1.56176679775467  | 4.97442958846558 | 2.58837429646529 |
| N  | 2.38962225339262  | 3.33566713372091 | 4.36642759969447 |
| C  | 4.24033898716970  | 4.04773961720592 | 6.26366464340771 |
| H  | 4.98635783793639  | 4.36428405231481 | 6.99768060213871 |
| C  | 3.65817056844596  | 2.77731679180689 | 6.31420239951038 |
| H  | 3.92285178249195  | 2.05589718569941 | 7.08704014023842 |
| C  | 2.72935094484467  | 2.45760899158293 | 5.33507856458957 |
| H  | 2.23548155386991  | 1.48667871576435 | 5.29492938935872 |
| C  | 3.00803549169623  | 4.55670098436277 | 4.42293231353177 |
| C  | 2.57243883180281  | 5.47874198663747 | 3.36302047684962 |
| C  | 2.71837091578446  | 7.43387918165066 | 2.21363972299956 |
| H  | 3.19828821478854  | 8.40933797760293 | 2.09967315768061 |
| C  | 1.70361040797094  | 7.01292402540281 | 1.34882886595659 |
| H  | 1.35468563617542  | 7.63796199984575 | 0.52717989197954 |
| C  | 1.14453435266755  | 5.76481774611270 | 1.57551309124557 |
| H  | 0.34351324663976  | 5.36335004401491 | 0.95438667140380 |
| C  | 0.70410436388021  | 1.28121597496656 | 3.30689149168597 |
| H  | 0.14641613697265  | 1.19840544311913 | 4.25767278362353 |
| H  | 1.68857053585856  | 0.79228394014465 | 3.41559034905400 |
| H  | 0.13895701126033  | 0.74582915917873 | 2.53447105491620 |
| C  | -0.44491390658014 | 3.12339516530584 | 1.75634308650510 |
| H  | -1.14860290574047 | 2.28621375428331 | 1.84072090323621 |
| H  | -0.02013525688884 | 3.11394692159549 | 0.73612381698628 |
| H  | -1.00372921778722 | 4.06404571095393 | 1.90861344388103 |



**Table S9.** Cartesian coordinates for the PBE0 optimized geometry.

|    |                   |                  |                  |
|----|-------------------|------------------|------------------|
| Ni | 1.02443198505548  | 3.15381408738126 | 2.98059621977688 |
| N  | 3.73407525725889  | 5.00466505653483 | 5.43642947631058 |
| N  | 3.18575891561773  | 6.63363577128596 | 3.19729907056606 |
| N  | 1.55302893115246  | 5.00632272424439 | 2.62031668191389 |
| N  | 2.45510586297498  | 3.33513723346412 | 4.32643779433853 |
| C  | 4.06350802992681  | 4.11545020947509 | 6.36353847881887 |
| H  | 4.69037321483515  | 4.47141138993181 | 7.17537347015335 |
| C  | 3.63115049964051  | 2.79903385436962 | 6.30812635732142 |
| H  | 3.91447565701858  | 2.07428781708130 | 7.05975021476159 |
| C  | 2.81024627462597  | 2.44674676479416 | 5.25548582068772 |
| H  | 2.41085318536828  | 1.44713263577522 | 5.13513904654961 |
| C  | 2.95819026798853  | 4.57663390851985 | 4.45976699545082 |
| C  | 2.55293522753717  | 5.48968112970821 | 3.37824140127253 |
| C  | 2.80725810939503  | 7.35861677232767 | 2.15364199650896 |
| H  | 3.33727808606635  | 8.29256317038145 | 1.99411869474128 |
| C  | 1.79410256272804  | 6.95090265262687 | 1.29916782856216 |
| H  | 1.49344416245264  | 7.54650925452393 | 0.44785272305163 |
| C  | 1.17950335068019  | 5.74683079492121 | 1.57701659717732 |
| H  | 0.37721104287126  | 5.34426999229061 | 0.97182426951632 |
| C  | 0.83053440953936  | 1.27444589676548 | 3.13924331453817 |
| H  | 0.31931136020791  | 1.01679031668262 | 4.07758537248421 |
| H  | 1.83248223232069  | 0.82065452606085 | 3.15418392128216 |
| H  | 0.27112600088362  | 0.80468916646153 | 2.32902257643419 |
| C  | -0.57913007981063 | 3.18784299600823 | 1.96021117695315 |
| H  | -1.32674752923950 | 2.47785926291177 | 2.31896414441347 |
| H  | -0.37627170464102 | 2.94575176395743 | 0.90816459300438 |
| H  | -1.02645531245451 | 4.19100085151452 | 2.01075176341074 |

**Table S10.** Cartesian coordinates for the TPSSh optimized geometry.

|    |                  |                  |                  |
|----|------------------|------------------|------------------|
| Ni | 1.01605874053002 | 3.15477826488399 | 2.99669812615423 |
| N  | 3.86704470965689 | 4.96096384452984 | 5.35497278496369 |
| N  | 3.18150292980035 | 6.64880191416881 | 3.19967284837824 |
| N  | 1.55160589242891 | 4.99333273570274 | 2.61596439052871 |
| N  | 2.40366529576587 | 3.34566461877816 | 4.35973718090016 |
| C  | 4.18560017616430 | 4.07078468599449 | 6.29410080051198 |
| H  | 4.89601844054177 | 4.39665081628832 | 7.04686425276797 |
| C  | 3.63532707385691 | 2.79221511867931 | 6.31671959706934 |
| H  | 3.89780153567076 | 2.07335897009374 | 7.08190938885243 |
| C  | 2.73770147724413 | 2.46427241142651 | 5.31772336778343 |
| H  | 2.26524921009032 | 1.49320241870463 | 5.25392536773564 |
| C  | 2.99522207905912 | 4.56722353687998 | 4.43585137475829 |
| C  | 2.57047744793116 | 5.48372486845664 | 3.36989522093211 |
| C  | 2.76167266368714 | 7.39843727167811 | 2.18167857584365 |
| H  | 3.26654877516045 | 8.34855344900602 | 2.04168379070249 |
| C  | 1.73499144951792 | 6.98764567244854 | 1.33580978436789 |
| H  | 1.40251853856117 | 7.59990097728904 | 0.50789987016247 |
| C  | 1.14669310547595 | 5.76353058017209 | 1.59210476045569 |
| H  | 0.33963119896529 | 5.36641163604271 | 0.99090609782762 |
| C  | 0.77469305113230 | 1.27388418459435 | 3.22721279053762 |
| H  | 0.17945683952117 | 1.09200622496433 | 4.13321269253687 |
| H  | 1.76443554620180 | 0.81246360283823 | 3.35449762963640 |

|   |                   |                  |                  |
|---|-------------------|------------------|------------------|
| H | 0.27557743695802  | 0.77326910405294 | 2.39630000065619 |
| C | -0.50818958816696 | 3.14779017566527 | 1.84214773622614 |
| H | -1.23430033281012 | 2.35989583898908 | 2.04821832267607 |
| H | -0.16866493171474 | 3.02827840533922 | 0.80324943066894 |
| H | -1.02055876122990 | 4.11563867233286 | 1.93929381636574 |

**Table S11.** Single point energy difference (kcal/mol) vs the PBE<sub>gas</sub> calculated one. All these single point energies were calculated starting from the PBE optimized geometry. Two environments are studied: in gas phase and with the presence of a toluene *continuum* (CPCM method).

|                                                          | PBE <sub>gas</sub> | PBE0 <sub>gas</sub> | TPSSh <sub>gas</sub> | PBE <sub>Tol</sub> | PBE0 <sub>Tol</sub> | TPSSh <sub>Tol</sub> |
|----------------------------------------------------------|--------------------|---------------------|----------------------|--------------------|---------------------|----------------------|
| $\Delta\text{SPE}(\text{PBE}_{\text{gas}}) - \text{SPE}$ | 0                  | 18.095              | -636.954             | -14.585            | 4.850               | -649.198             |

**Table S12.** MO energy gaps (cm<sup>-1</sup>) calculated with three different functionals (PBE, PBE0 and TPSSh) starting from the PBE optimized geometry. Two environments are studied: in gas phase and with the presence of a toluene *continuum* (CPCM method).

| MO                 | PBE <sub>gas</sub> | PBE0 <sub>gas</sub> | TPSSh <sub>gas</sub> | PBE <sub>Tol</sub> | PBE0 <sub>Tol</sub> | TPSSh <sub>Tol</sub> |
|--------------------|--------------------|---------------------|----------------------|--------------------|---------------------|----------------------|
| HOMO =><br>LUMO    | 7260.22            | 22324.96            | 13758.86             | 8072.28            | 23975.41            | 14856.24             |
| LUMO =><br>LUMO +1 | 4299.51            | 5366.15             | 4903.06              | 4378.52            | 5469.31             | 5006.216             |

PBE<sub>gas</sub>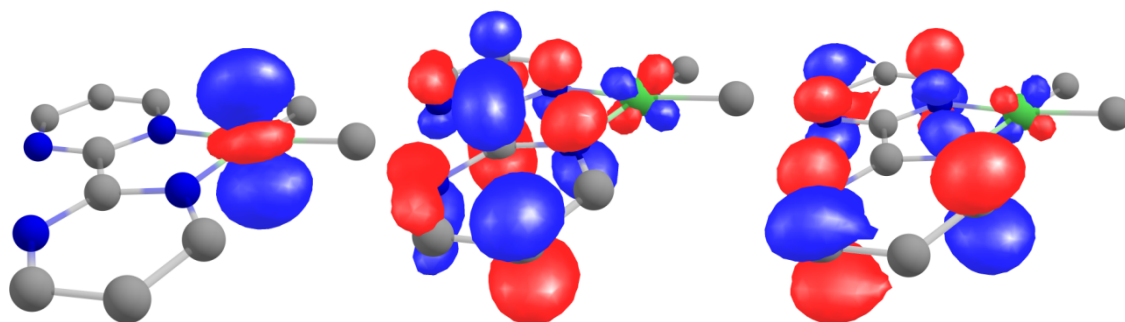PBE0<sub>gas</sub>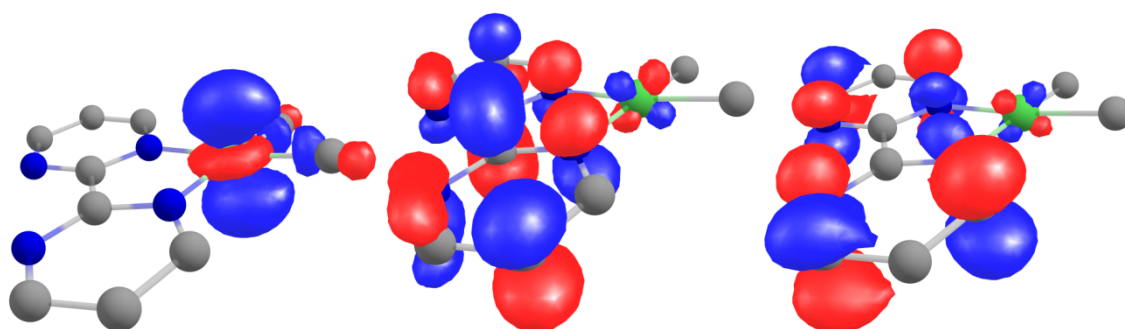TPSSH<sub>gas</sub>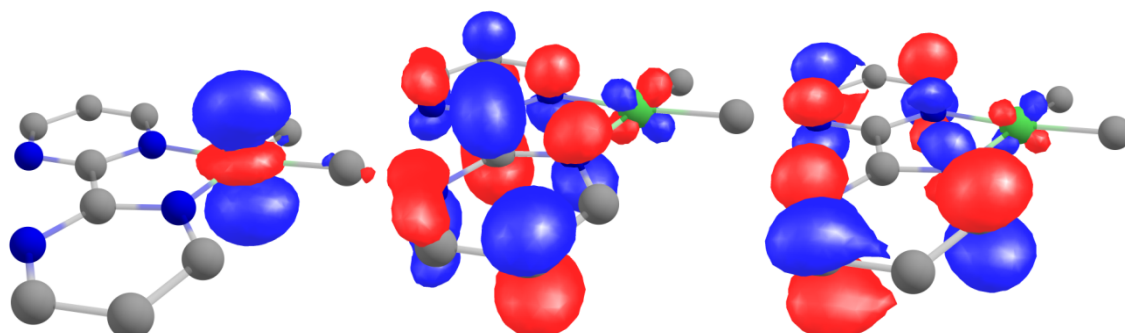

**Figure S24.** Kohn-Sham orbitals obtained with three different functionals (PBE, PBE0 and TPSSH) starting from the PBE optimized geometry in gas phase.

PBE<sub>Tol</sub>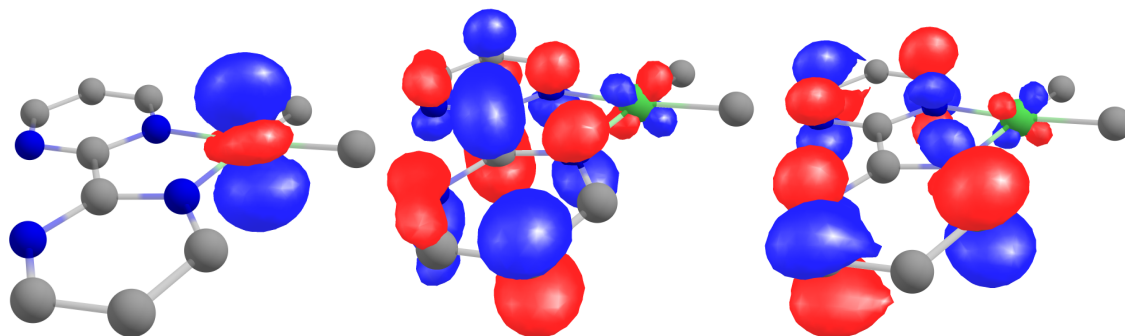PBE0<sub>Tol</sub>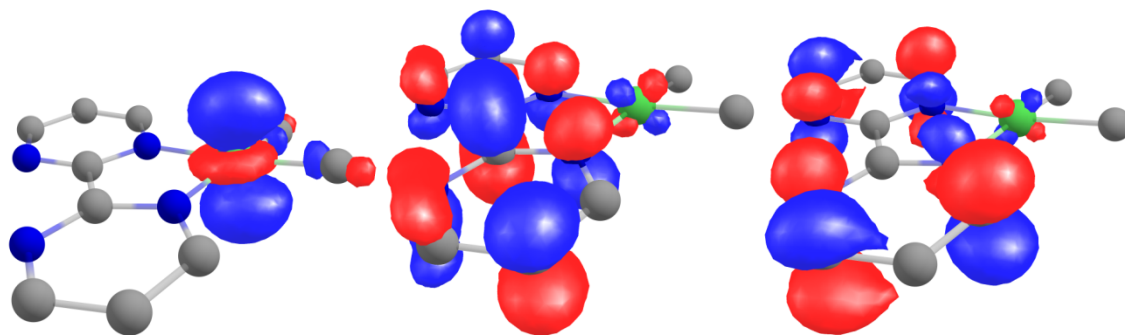TPSSh<sub>Tol</sub>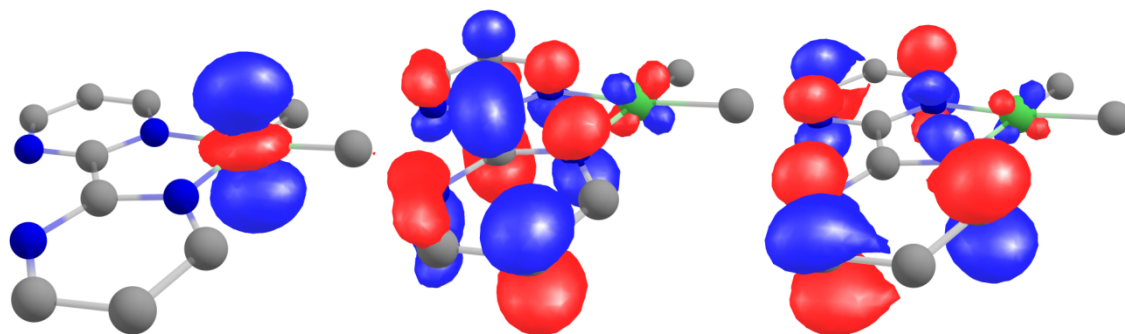

**Figure S25.** Kohn-Sham orbitals obtained with three different functionals (PBE, PBE0 and TPSSh) starting from the PBE optimized geometry and using a toluene *continuum* (CPCM method).
